# Supplementary material for: A global model simulation of present and future nitrate aerosols and their direct radiative forcing of climate
Source: Copernicus journal article supplement (doi:10.5194/acp-14-11031-2014), 2014-10-21
Supplement: Supplementary file [file acp-14-11031-2014-supplement.pdf]

Supplement of Atmos. Chem. Phys., 14, 11031–11063, 2014  
<http://www.atmos-chem-phys.net/14/11031/2014/>  
doi:10.5194/acp-14-11031-2014-supplement  
© Author(s) 2014. CC Attribution 3.0 License.

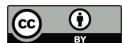

*Supplement of*

## **A global model simulation of present and future nitrate aerosols and their direct radiative forcing of climate**

**D. A. Hauglustaine et al.**

*Correspondence to:* D. A. Hauglustaine ([didier.hauglustaine@lsce.ipsl.fr](mailto:didier.hauglustaine@lsce.ipsl.fr))

## 8 **Model description**

9 Free ammonia is used for the neutralization of nitric acid to ammonium nitrate aerosol  
10 following the equilibrium reaction:

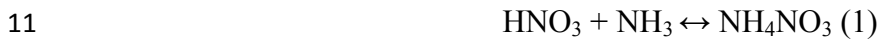

12 The equilibrium constant ( $K_p$ ) of (1) strongly depends on relative humidity and temperature.  
13 The parameterization used for this dependence is based on Mozurkewich (1993). First, the  
14 deliquescence relative humidity (DRH, %) is calculated based on Seinfeld and Pandis (1998):

$$15 \quad \text{DRH} = \exp(723.7/T + 1.6954) \quad (2)$$

16 where T is the air temperature (K). For relative humidities lower than DRH,  $K_p = K_{pd}$  and is  
17 calculated with:

$$18 \quad K_{pd} = \exp[118.87 - 24084/T - 6.025 \ln(T)] \quad (3)$$

19 For relative humidities higher than DRH,  $K_p = K_{ph}$  and depends on both temperature and  
20 relative humidity (RH) and is calculated based on :

$$21 \quad K_{ph} = K_{pd} (p_1 - p_2 \text{RH}_1 + p_3 \text{RH}_1^2) \text{RH}_1^{1.75} \quad (4)$$

22 With  $\text{RH}_1$  defined as  $(1 - \text{RH}/100)$  and  $p_1$ ,  $p_2$ , and  $p_3$  provided by:

$$23 \quad p_1 = \exp[-135.94 + 8763/T + 19.12 \ln(T)] \quad (5)$$

$$24 \quad p_2 = \exp[-122.65 + 9969/T + 16.22 \ln(T)] \quad (6)$$

$$25 \quad p_3 = \exp[-182.61 + 13875/T + 24.46 \ln(T)] \quad (7)$$

26

## 27 **Model evaluation**

### 28 **Box model simulations**

29 In order to evaluate the thermodynamic nitrate aerosol module developed and used in INCA,  
30 we have developed a box model version and used it as a stand-alone version to be evaluated  
31 against the ISORROPIA version 2.1 reference model (Nenes et al., 1998). Both the INCA box  
32 model and ISORROPIA are constrained by the same input parameters. The input parameters  
33 are then varied in order to compare the behavior of the two models across the range of

34 variation in key inputs (i.e., total sulfate TS, total ammonia TA, total nitrate TN, relative  
35 humidity RH, and temperature T). The reference input parameters for all simulations are : T =  
36 280K, RH = 0.9, TS = 2  $\mu\text{g}/\text{m}^3$ , TA = 4  $\mu\text{g}/\text{m}^3$ , and TN= 5  $\mu\text{g}/\text{m}^3$ . Figure S1 shows the  
37 evolution of the simulated  $\text{NO}_3^-$  and  $\text{NH}_4^+$  equilibrium concentrations when these parameters  
38 are varied separately over a given interval and compares the output to the ISORROPIA  
39 results. Overall an excellent agreement is obtained between the INCA module and  
40 ISORROPIA. The sensitivity of the two models to key environmental parameters as  
41 encountered in the global atmosphere are very similar and the simulated concentrations in  
42 close agreement. The major disagreement we note is at sulfate concentrations larger than  
43 about 10  $\mu\text{g}/\text{m}^3$  for which the INCA module forms ammonium sulfate preferentially and  
44 hence significantly underestimates the ammonium nitrate levels compared to ISORROPIA.  
45 This disagreement has no effect on the simulated global concentrations since sulfate  
46 concentrations larger than 10  $\mu\text{g}/\text{m}^3$  are hardly not reached in the global model grid-cells. It  
47 should also be pointed out that at temperature higher than about 295K, the volatilization of  
48 ammonium nitrate is too efficient and the concentration simulated with INCA drops more  
49 rapidly to zero than in ISORROPIA. This limitation has to be kept in mind but even under a  
50 warming climate these high temperatures are not often reached in regions with fine particulate  
51 nitrate formation or only occasionally and will have a minor impact on the model results.

## 52 **Diurnal variations**

53 Nitrate aerosols have the ability to evaporate back into the gas phase. As illustrated by high  
54 temporal resolution measurements (e.g., Slanina et al., 2001; Trebs et al., 2004; ten Brink et  
55 al., 2007; Dall'Osto et al., 2009; Morgan et al., 2010; Schaap et al., 2011; Mensah et al., 2012;  
56 Aan de Brugh et al., 2012), this means that nitrates have a pronounced diurnal cycle and  
57 spend most of the daytime in the gas phase. The detailed evaluation of the diurnal cycle is out  
58 of the scope of the use of a global model and of this paper. However, since this diurnal  
59 variation has an impact on the radiative forcing, we illustrate in Figure S2 the simulated  
60 diurnal variation of nitrate concentrations at four different sites for the period 1/8/2009 to  
61 30/10/2009. A very pronounced diurnal cycle is indeed calculated over the Po Valley or over  
62 China. As measured at several sites by the studies mentioned above, nitrates build up during  
63 the night and reach a maximum concentration early in the morning. The minimum in  $\text{NO}_3^-$   
64 concentrations occur during daytime due to increased boundary layer height and increased  
65 instability at higher temperature, and are often close to zero during that period. This daytime  
66 minimum coincides with a maximum in  $\text{HNO}_3$  concentrations (not shown) suggesting that

67 volatilization of nitrate particles indeed occurs as illustrated by several studies (e.g., Dall'Osto  
68 et al., 2009; Schaap et al., 2011; Aan de Brugh et al., 2012) . In England, the nitrate  
69 concentrations and their variation are in agreement with the range of about 0-12  $\mu\text{g}/\text{m}^3$  and  
70 variability measured by Dall'Osto et al. (2009) in October 2006. The variability of  $\text{NO}_3$  in the  
71 model can be explained by a combination of the diurnal cycle associated with the  
72 thermodynamic equilibrium of nitrate formation, superimposed on a variability associated  
73 with changing meteorological conditions and transport of pollution episodes from the  
74 continent. High pollution episodes of nitrate particles are also simulated in the Netherlands  
75 where  $\text{NH}_3$  concentrations reach more than 10  $\mu\text{g}/\text{m}^3$ .

## 76 **Present-day nitrate column**

77 Figure S3 shows the three components of the total nitrate column and shows the fine mode,  
78 coarse mode on dust and coarse mode on sea-salt separately. This figure clearly shows that  
79 fine nitrate particles associated with anthropogenic emissions contribute to a large extent to  
80 the maximum calculated in the central US, in Northern Europe and over the Po Valley, in  
81 Northern India and in China. Over Africa, Saudi Arabia, Central Europe and in Northern  
82 China, nitrates on dust contribute for more than 4-10  $\text{mg}/\text{m}^2$  to the nitrate column. Over the  
83 Mediterranean and in Southern Europe, the contribution of coarse nitrates on dust represents  
84 about 50% of the calculated total nitrate column. The contribution of nitrates on sea-salt is  
85 lower and generally close to 0.5  $\text{mg}/\text{m}^2$  over the continents. It only reaches 1  $\text{mg}/\text{m}^2$  in  
86 localized areas, in particular off the coast of the Eastern US, or over the Mediterranean where  
87 both pollution and sea-salt particle are present.

## 88 **Comparison with measurements**

89 Figure S4-S6 compare the simulated and measured surface concentrations of  $\text{SO}_4^-$ ,  $\text{NH}_4^+$ , and  
90  $\text{NO}_3^-$  from the EBAS database at NILU. EBAS holds data from EMEP (emep.int), from the  
91 US National Atmospheric Deposition Program/National Trend Network (NADP/NTN;  
92 <http://nadp.sws.uiuc.edu/NTN>), from the US Inter- agency Monitoring of Protected Visual  
93 Environments (IMPROVE; <http://vista.cira.colostate.edu/IMPROVE>), from the Clean Air  
94 Status and Trends Network (CASTNET; <http://java.epa.gov/castnet>) and the EANET, Data  
95 on the Acid Deposition in the East Asian Region (<http://www.eanet.cc/>). These comparisons  
96 have been prepared using the AEROCOM evaluation tools (Schulz et al., 2006). The aerosols  
97 measurements are mostly from the CASTNET/IMPROVE network over Northern America,

98 from the EMEP network in Europe. This evaluation is performed for the year 2006 based on  
99 matching daily mean data, averaged to monthly means.

100 To obtain a large spatial coverage with respect to evaluation of nitrate and ammonium model  
101 values we have included measurements from different methods. These use different  
102 combinations of filterpacks and denuders. Little harmonization of the methods has been  
103 achieved globally and it is not possible to rely on just one method. Depending on filter type,  
104 sampling set-up, temperature and changing ambient conditions during a sampling interval  
105 considerable sampling artefacts may occur. At higher temperatures, evaporation of  
106 ammonium nitrate from filters has been shown to lead to losses of up to 50% in summer  
107 conditions (Vecchi et al., 2009; Sickles and Shadwick, 2002; Allegrini et al., 1994; Yu et al.,  
108 2005, Hering and Cass, 1999; Chow et al., 2005, Ashbaugh and Elfred, 2004, Schaap et al.,  
109 2004, Schaap et al., 2002). Such sampling artefacts may explain in total a positive model bias,  
110 while negative model bias clearly points to model errors. We do not find a clear north-south  
111 gradient in bias, neither in Europe nor in Northern America, higher temperatures in the south  
112 are not associated with higher positive model bias. However, in central Europe there are  
113 several sites, where the positive bias of the model is high in summer and almost absent in  
114 winter. In depth inspection of nitrate bias on a map and per measurement site may be accessed  
115 via the AeroCom web interface ([http://aerocom.met.no/cgi-](http://aerocom.met.no/cgi-bin/aerocom/surfobs_annualrs.pl?PROJECT=INCA)  
116 [bin/aerocom/surfobs\\_annualrs.pl?PROJECT=INCA](http://aerocom.met.no/cgi-bin/aerocom/surfobs_annualrs.pl?PROJECT=INCA)  
117  [&Run0=LOI\\_DH10n&Parameter0=SCONC\\_NO3](http://aerocom.met.no/cgi-bin/aerocom/surfobs_annualrs.pl?PROJECT=INCA)).

118 Figure S7-S10 compares the wet deposition of  $\text{SO}_x$  ( $=\text{SO}_2+\text{SO}_4^-$ ),  $\text{NH}_x$  ( $=\text{NH}_3+\text{NH}_4^+$ ), and  
119  $\text{NO}_y$  ( $=\text{NO}+\text{NO}_2+\text{NO}_3+\text{HNO}_2+\text{HNO}_3+\text{HNO}_4+2\text{N}_2\text{O}_5+\text{PAN}+\text{organic nitrates}+\text{particulate NO}_3^-$   
120 ) calculated by the model with the measurements from the EMEP network over Europe, from  
121 the NADP network over Northern America and from the EANET network over Eastern Asia.  
122 Over the whole dataset, the sulfate deposition is underestimated by the model with a  
123 Normalized Mean Bias (NMB) of -59%, mostly driven by a high underestimation over  
124 Eastern Asia. Over Europe the deposition is slightly underestimated by the model by 27% and  
125 by 20% in Northern America. In Eastern Asia, a higher underestimation of 80% is obtained.  
126 The wet deposition of  $\text{NH}_x$  is underestimated by 34% in the model over the whole dataset.  
127 This term is well represented in Europe (NMB=-4.5%) and to a lesser extent in Northern  
128 America (NMB=-32%). This deposition term is again significantly underestimated in Eastern  
129 Asia (NMB=-60%). The wet deposition of oxidized nitrogen from  $\text{HNO}_3+\text{NO}_3^-$  is  
130 underestimated by 40% over the whole domain. This deposition term is relatively well

131 represented in Europe but underestimated by -28% and better represented over Northern  
132 America (NMB=+13%). Again, in Eastern Asia, a significant underestimate of the wet  
133 deposition is obtained (NMB=-54%).

134

135

136 Figure S11 present an evaluation of the calculated total AOD by comparing with the  
137 measurements from the AERONET network (Holben et al., 2001, Kinne et al., 2006).  
138 Matching daily data from the model and Aeronet were aggregated to monthly averages.  
139 Worldwide, the measured and modeled AOD show a relatively good correlation (R=0.57).  
140 The arithmetic mean for the measurements of 0.226 is however underestimated by the  
141 modeled values of 0.202 with a Normalized Mean Bias (NMB) of -11%. A good agreement  
142 with the AERONET measurements is obtained over Northern America. Over this region the  
143 model slightly underestimates the measurements (NMB=-4.5%, R=0.77). Over Africa, higher  
144 AOD associated with dust aerosols are calculated. A fairly good correlation is reached  
145 (R=0.66) with also a light underestimate by the model of -10%. Over Eastern Asia, the model  
146 underestimate the AOD (NMB=-39%). Over Europe, the model slightly overestimates the  
147 measurements (NMB=+6%).

#### 148 **Future evolution of atmospheric composition and surface deposition**

149 Figure S12 shows the change in NH<sub>3</sub> surface concentration from the present-day levels in  
150 2030 and 2100 for both RCP4.5 and RCP8.5 (see Fig. 6 from the manuscript for the reference  
151 level). For RCP8.5 a significant increase is calculated everywhere in 2030 and 2100 except in  
152 Indonesia where biomass burning emissions are reduced. In the central United States,  
153 Northern and central Europe, India and China, NH<sub>3</sub> increases by up to 2 µg/m<sup>3</sup> in 2100. For  
154 the RCP4.5 scenario, a significant increase is still predicted in India and in China where  
155 emissions are still predicted to rise. However, concentrations are significantly reduced in  
156 Western and Eastern Europe by up to 1 µg/m<sup>3</sup> and a lesser increase of 0.5-1 µg/m<sup>3</sup> is  
157 calculated in the central US. Figure S13 shows the corresponding change in HNO<sub>3</sub> surface  
158 concentrations. Due to a reduction in NO<sub>x</sub> emissions, HNO<sub>3</sub> has already significantly  
159 decreased in 2030 in Northern America and Europe in both scenarios. In contrast, a strong  
160 increase is calculated in India and in China reaching more than 2 µg/m<sup>3</sup> in 2030. In 2100, the  
161 HNO<sub>3</sub> reduction is almost generalized over the continents with the exception of biomass

162 burning regions in Africa and India in the case of RCP8.5. Figure S14 shows the change in  
163  $\text{SO}_4^{2-}$  surface concentration in 2030 and 2100 for both RCP8.5 and RCP4.5. The concentration  
164 increases in India and Southeast Asia by more than  $2 \mu\text{g}/\text{m}^3$  in 2030. As expected from the  
165 sharp decrease in  $\text{SO}_2$  emissions, at the end of the XXI<sup>st</sup> century, a general decrease of the  
166 surface concentration is calculated, reaching more than  $2 \mu\text{g}/\text{m}^3$  in Northern America, Europe,  
167 and China. As a result of these changes in nitrate precursor surface concentrations, nitrate  
168 particles are expected to undergo significant variations in the future. Figure S15, shows the  
169 evolution of nitrate particles surface concentrations for 2030 and 2100 and for scenarios  
170 RCP8.5 and RCP4.5. The surface concentration increases in India and Southeast Asia by  
171 more than  $2 \mu\text{g}/\text{m}^3$  in 2030. As a consequence of the sharp decrease in  $\text{HNO}_3$  concentrations, a  
172 decrease of the surface concentration is calculated, reaching more than  $2 \mu\text{g}/\text{m}^3$  in Northern  
173 America and Europe in 2030 and 2100. This decrease in surface nitrate concentrations also  
174 occurs in China in 2100.

175 Figure S16, shows the change from the present-day (see Fig. 4 from the main paper for  
176 reference levels) of the nitrate column in 2030 and 2100 for the two extremes scenarios  
177 RCP4.5 and RCP8.5. The change in nitrate precursors is responsible for a strong increase of  
178 the nitrate column in the northern hemisphere. The strong decrease in nitrate surface  
179 concentrations calculated over Europe and China in 2030 and 2100 dominates the change in  
180 the column which decreases by up to  $2 \text{mg}/\text{m}^2$  over these regions.

181 Figure S17 shows the evolution of the total nitrogen deposition averaged over various regions  
182 of the world. The total  $\text{NO}_y + \text{NH}_x$  (wet + dry) deposition is presented. In Europe and  
183 Northern America, the total N deposition slightly decreases or remains close to its present-day  
184 value in the case of scenario RCP8.5. In Asia and India, the  $\text{NO}_y$  deposition generally  
185 increases in 2030 or 2050 due to higher  $\text{NO}_x$  emissions in these regions before decreasing at  
186 the end of the XXI<sup>st</sup> century. In addition, the  $\text{NH}_x$  deposition generally increases during the  
187 course of the century to reach maximum values in 2100. Figure S18 shows that the fraction of  
188 N deposited as  $\text{NH}_x$  increases from about 60% to 80% in these regions. The same tendency is  
189 found over oceanic regions and globally. The total N deposited remains fairly stable or  
190 slightly decreases in these regions during the XXI<sup>st</sup> century but the fraction of N deposited as  
191  $\text{NH}_x$  increases from 45% to 55-70% over the ocean and from 55% to 70-80% globally.

192

193 **References**

- 194 Aan de Brugh, J. M. J., J. S. Henzing, M. Schaap, W. T. Morgan, C. C. van Heerwaarden, E.  
195 P. Weijers, H. Coe, and M. C. Krol, Modelling the partitioning of ammonium nitrate in the  
196 convective boundary layer, *Atmos. Chem. Phys.*, 12, 3005-3023, 2012.
- 197 Allegrini, I., A. Febo, C. Perrino and P. Masia, Measurement of Atmospheric Nitric-Acid in  
198 Gas-Phase and Nitrate in Particulate Matter by Means of Annular Denuders, *International*  
199 *Journal of Environmental Analytical Chemistry*, 54, 183-201, 1994.
- 200 Ashbaugh, L. L. and R. A. Eldred, Loss of Particle Nitrate from Teflon Sampling Filters:  
201 Effects on Measured Gravimetric Mass in California and in the Improve Network, *Journal of*  
202 *the Air & Waste Management Association*, 54, 93-104, 2004.
- 203 Chow, J. C., J. G. Watson, D. H. Lowenthal and K. L. Magliano, Loss of Pm<sub>2.5</sub> Nitrate from  
204 Filter Samples in Central California, *Journal of the Air & Waste Management Association*  
205 55, 1158-1168, 2005.
- 206 Dall'Osto, M., R. M. Harrison, H. Coe, P. I. Williams, and J. D. Allan, Real time chemical  
207 characterization of local and regional nitrate aerosols, *Atmos. Chem. Phys.*, 9, 3709-3720,  
208 2009.
- 209 Hering, S. and G. Cass, The Magnitude of Bias in the Measurement of Pm<sub>2.5</sub> Arising from  
210 Volatilization of Particulate Nitrate from Teflon Filters, *Journal of the Air & Waste*  
211 *Management Association*, 49, 725-733, 1999.
- 212 Mensah, A. A., R. Holzinger, R. Otjes, A. Trimborn, Th. F. Mentel, H. ten Brink, B. Hensing,  
213 and A. Kiendler-Scharr, Aerosol chemical composition at Cabauw, the Netherlands as  
214 observed in two intensive periods in May 2008 and March 2009, *Atmos. Chem. Phys.*, 12,  
215 4723-4742, 2012.
- 216 Morgan, W. T., J. D. Allan, K. N. Bower, M. Esselborn, B. Harris, J. S. Henzing, E. J.  
217 Highwood, A. Kiendler-Scharr, G. R. McMeeking, A. A. Mensah, M. J. Northway, S.  
218 Osborne, P. I. Williams, R. Krejci, and H. Coe, Enhancement of the aerosol direct radiative  
219 effect by semi-volatile aerosol components: airborne measurements in North-Western Europe,  
220 *Atmos. Chem. Phys.*, 10, 8151-8171, 2010.



221 Mozurkewich, M., The dissociation constant of ammonium nitrate and its dependence on  
222 temperature, relative humidity and particle size, *Atmos. Environ.*, 27A, 261-270, 1993.

223 Nenes, A., S. Pandis, and C. Pilinis, ISORROPIA: a new thermodynamic equilibrium model  
224 for multiphase multicomponent inorganic aerosols, *Aquat. Geochem.*, 4, 123-152, 1998.

225 Schaap, M., K. Muller and H. M. ten Brink, Constructing the European Aerosol Nitrate  
226 Concentration Field from Quality Analysed Data, *Atmospheric Environment*, 36, 1323-1335,  
227 2002.

228 Schaap, M., G. Spindler, M. Schulz, K. Acker, W. Maenhaut, A. Berner, W. Wieprecht, N.  
229 Streit, K. Muller, E. Brüggemann, X. Chi, J. P. Putaud, R. Hitzinger, H. Puxbaum, U.  
230 Baltensperger and H. ten Brink, Artefacts in the Sampling of Nitrate Studied in the Intercomp  
231 Campaigns of Eurotrac-Aerosol, *Atmospheric Environment*, 38, 6487-6496, 2004.

232 Schaap, M., R. P. Otjes, and E. P. Weijers, Illustrating the benefit of using hourly monitoring  
233 data on secondary inorganic aerosol and its precursors for model evaluation, *Atmos. Chem.*  
234 *Phys.*, 11, 11041-11053, 2011.

235 Seinfeld, J. H., and S. N. Pandis, *Atmospheric chemistry and Physics*, John Wiley and Sons,  
236 New York, 1998.

237 Sickles, J. E. and D. S. Shadwick, Biases in Clean Air Status and Trends Network Filter Pack  
238 Results Associated with Sampling Protocol, *Atmospheric Environment*, 36, 4687-4698, 2002.

239 Slanina, J., H. M. ten Brink, R. P. Otjes, A. Even, P. Jongejan, A. Khlystov, A. Waijers-  
240 Ijpelaan, M. Hu, and Y. Lu, The continuous analysis of nitrate and ammonium in aerosols by  
241 the steam jet aerosol collector (SJAC): extension and validation of the methodology, *Atmos.*  
242 *Environ.*, 35, 2319-2330, 2001.

243 Ten Brink, H., R. Otjes, P. Jongejan, S. Slanina, An instrument for semi-continuous  
244 monitoring of the size-distribution of nitrate, ammonium, sulphate and chloride in aerosol,  
245 *Atmos. Environ.*, 41, 2768-2779, 2007.

246 Trebs, I., F. X. Meixner, J. Slanina, R. Otjes, P. Jongejan, and M. O. Andreae, Real-time  
247 measurements of ammonia, acidic trace gases and water-soluble inorganic aerosol species at a  
248 rural site in the Amazon Basin, *Atmos. Chem. Phys.*, 4, 967-987, 2004.

249 Vecchi, R., G. Valli, P. Fermo, A. D'Alessandro, A. Piazzalunga and V. Bernardoni, Organic  
250 and Inorganic Sampling Artefacts Assessment, *Atmospheric Environment*, 43, 1713-1720,  
251 2009.

252 Yu, X. Y., L. Taehyoung, B. Ayres, S. M. Kreidenweis, J. L. Collett and W. Maim.  
253 Particulate Nitrate Measurement Using Nylon Filters, *Journal of the Air & Waste*  
254 *Management Association*, 55, 1100-1110, 2005.

255

256 **Figure Captions**

257

258 Figure S1. Variation of  $\text{NO}_3^-$  (blue) and  $\text{NH}_4^+$  (red) equilibrium concentrations ( $\mu\text{g}/\text{m}^3$ ) as a  
259 function of total sulfate, total ammonia, total nitrate ( $\mu\text{g}/\text{m}^3$ ), relative humidity (%) and  
260 temperature (T). INCA model results : solid line, ISORROPIA model: triangles.

261

262 Figure S2. Simulated diurnal variation of  $\text{NO}_3^-$  surface concentration ( $\mu\text{g}/\text{m}^3$ ) during the  
263 1/08/2009 to 30/10/2009 period in England, the Po valley, The Netherlands, and in Northern  
264 China.

265

266 Figure S3. Annual mean tropospheric column of (top) fine mode nitrate aerosols, (middle)  
267 coarse mode nitrates on dust, and (bottom) coarse mode nitrates on sea-salt simulated for  
268 present-day conditions ( $\text{mg}/\text{m}^2$ ).

269

270 Figure S4. Simulated surface concentration of sulfates ( $\mu\text{S}/\text{m}^3$ ), ammonium ( $\mu\text{N}/\text{m}^3$ ), and  
271 nitrates ( $\mu\text{N}/\text{m}^3$ ) for the year 2006 compared to EBAS data over the world (all available data).  
272 Dashed lines indicate 1:2 and 2:1 ratios.

273

274 Figure S5. Simulated surface concentration of sulfates ( $\mu\text{S}/\text{m}^3$ ), ammonium ( $\mu\text{N}/\text{m}^3$ ), and  
275 nitrates ( $\mu\text{N}/\text{m}^3$ ) for the year 2006 compared to EBAS data over Europe. Dashed lines indicate  
276 1:2 and 2:1 ratios.

277

278 Figure S6. Simulated surface concentration of sulfates ( $\mu\text{S}/\text{m}^3$ ), ammonium ( $\mu\text{N}/\text{m}^3$ ), and  
279 nitrates ( $\mu\text{N}/\text{m}^3$ ) for the year 2006 compared to EBAS data over Northern America. Dashed  
280 lines indicate 1:2 and 2:1 ratios.

281

282 Figure S7. Simulated  $\text{SO}_x$  ( $\text{gS}/\text{m}^2/\text{yr}$ ),  $\text{NH}_x$  and  $\text{NO}_y$  ( $\text{gN}/\text{m}^2/\text{yr}$ ) wet deposition for the year  
283 2006 compared to EBAS data for the world (all available data). Dashed lines indicate 1:2 and  
284 2:1 ratios.

285

286 Figure S8. Simulated  $\text{SO}_x$  ( $\text{gS}/\text{m}^2/\text{yr}$ ),  $\text{NH}_x$  and  $\text{NO}_y$  ( $\text{gN}/\text{m}^2/\text{yr}$ ) wet deposition for the year  
287 2006 compared to EBAS data over Europe. Dashed lines indicate 1:2 and 2:1 ratios.

288

289 Figure S9. Simulated  $\text{SO}_x$  ( $\text{gS}/\text{m}^2/\text{yr}$ ),  $\text{NH}_x$  and  $\text{NO}_y$  ( $\text{gN}/\text{m}^2/\text{yr}$ ) wet deposition for the year  
290 2006 compared to EBAS data over Northern America. Dashed lines indicate 1:2 and 2:1  
291 ratios.

292

293 Figure S10. Simulated  $\text{SO}_x$  ( $\text{gS}/\text{m}^2/\text{yr}$ ),  $\text{NH}_x$  and  $\text{NO}_y$  ( $\text{gN}/\text{m}^2/\text{yr}$ ) wet deposition for the year  
294 2006 compared to EBAS data over Eastern Asia. Dashed lines indicate 1:2 and 2:1 ratios.

295

296 Figure S11. Simulated total aerosol optical depth at 550 nm for the year 2006 compared to the  
297 AERONET data worldwide (all available data), over Europe, Northern America, Northern  
298 Africa, and Eastern Asia. Dashed lines indicate 1:2 and 2:1 ratios.

299

300 Figure S12. Changes in ammonia surface concentration ( $\mu\text{g}/\text{m}^3$ ) relative to the present-day  
301 distribution for scenario RCP8.5 (top) and RCP4.5 (bottom) calculated for 2030 (left) and  
302 2100 (right).

303

304 Figure S13. Changes in nitric acid surface concentration ( $\mu\text{g}/\text{m}^3$ ) relative to the present-day  
305 distribution for scenario RCP8.5 (top) and RCP4.5 (bottom) calculated for 2030 (left) and  
306 2100 (right).

307

308 Figure S14. Changes in sulfate surface concentration ( $\mu\text{g}/\text{m}^3$ ) relative to the present-day  
309 distribution for scenario RCP8.5 (top) and RCP4.5 (bottom) calculated for 2030 (left) and  
310 2100 (right).

311

312 Figure S15. Changes in nitrate surface concentration ( $\mu\text{g}/\text{m}^3$ ) relative to the present-day  
313 distribution for scenario RCP8.5 (top) and RCP4.5 (bottom) calculated for 2030 (left) and  
314 2100 (right).

315

316 Figure S16. Changes in nitrate column ( $\text{mg}/\text{m}^2$ ) relative to the present-day distribution for  
317 scenario RCP8.5 (top) and RCP4.5 (bottom) calculated for 2030 (left) and 2100 (right).

318

319 Figure S17. Evolution of  $\text{NH}_x+\text{NO}_y$  total deposition ( $\text{mgN}/\text{m}^2/\text{yr}$ ) for scenario RCP8.5 (red),  
320 RCP6.0 (yellow), RCP4.5 (green) and RCP2.6 (blue) between present-day and 2100. The  
321 averaged deposition is depicted for Europe, Northern America, Northern Asia, Southern Asia,  
322 India, Africa, Southern America, Australia, the global ocean, and the globe.

323

324 Figure S18. Evolution of the  $\text{NH}_x$  fractional contribution to  $\text{NH}_x+\text{NO}_y$  total deposition (%) for  
325 scenario RCP8.5 (red), RCP6.0 (yellow), RCP4.5 (green) and RCP2.6 (blue) between present-  
326 day and 2100. The averaged deposition is depicted for Europe, Northern America, Northern  
327 Asia, Southern Asia, India, Africa, Southern America, Australia, the global ocean, and the  
328 globe.

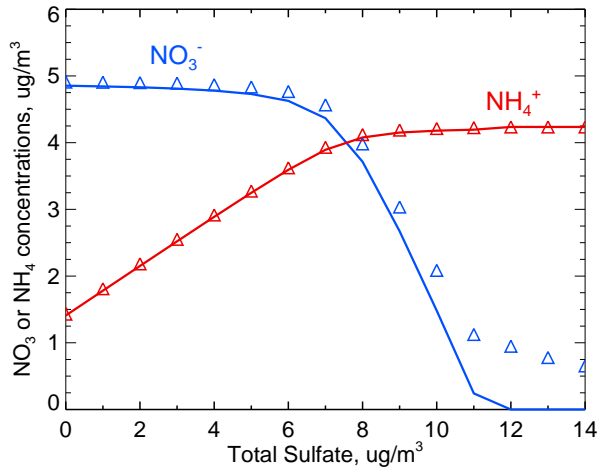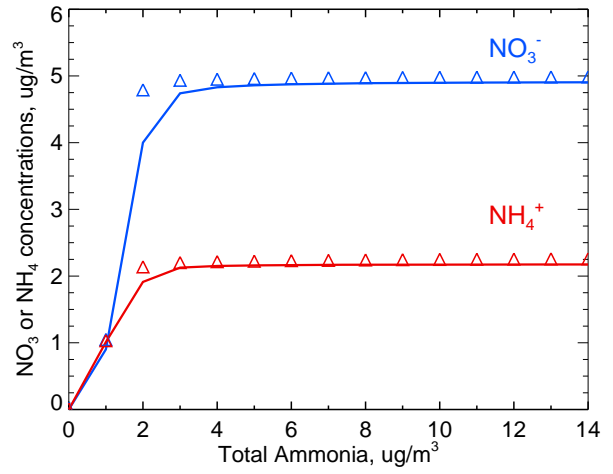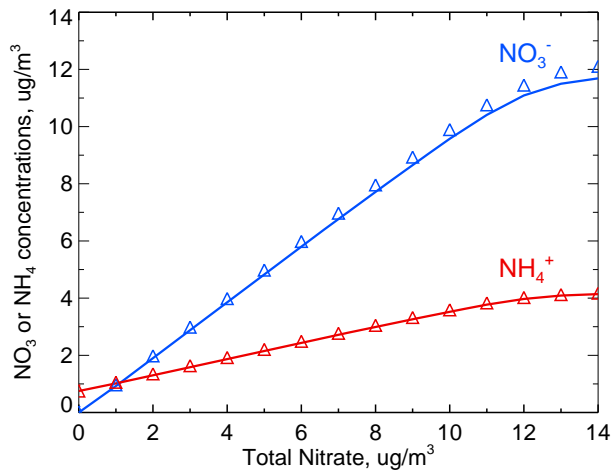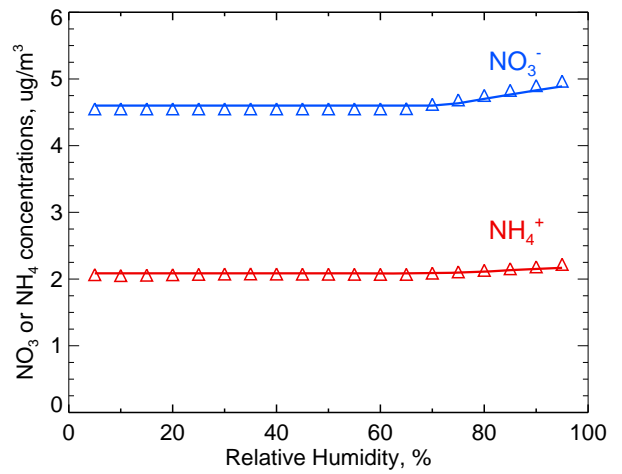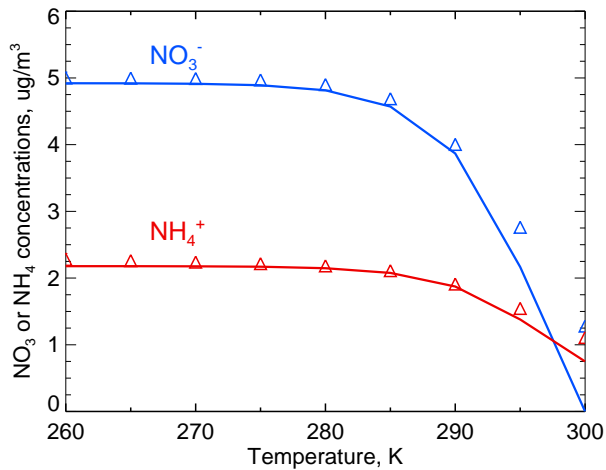

Figure S1

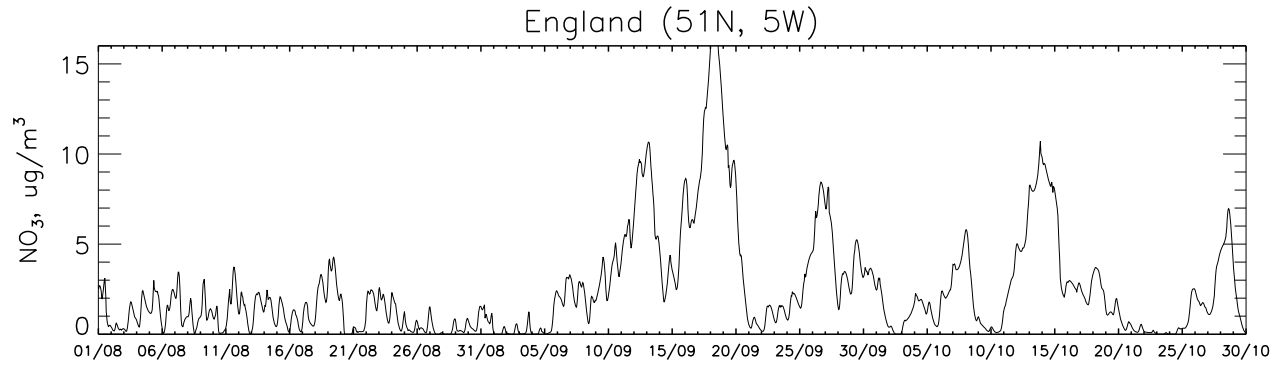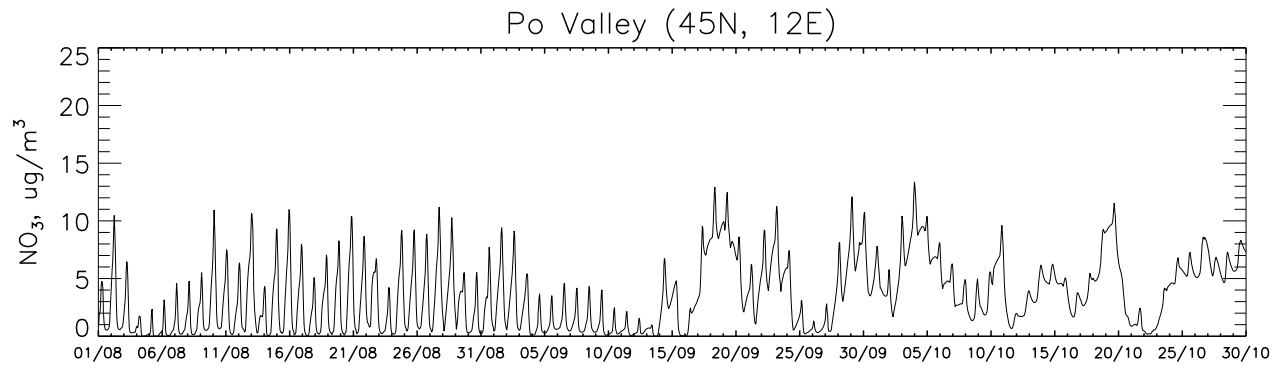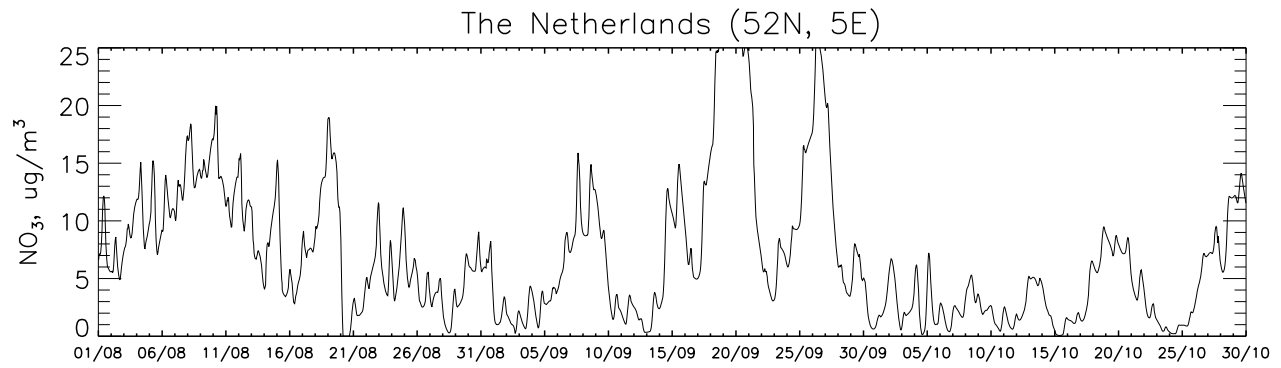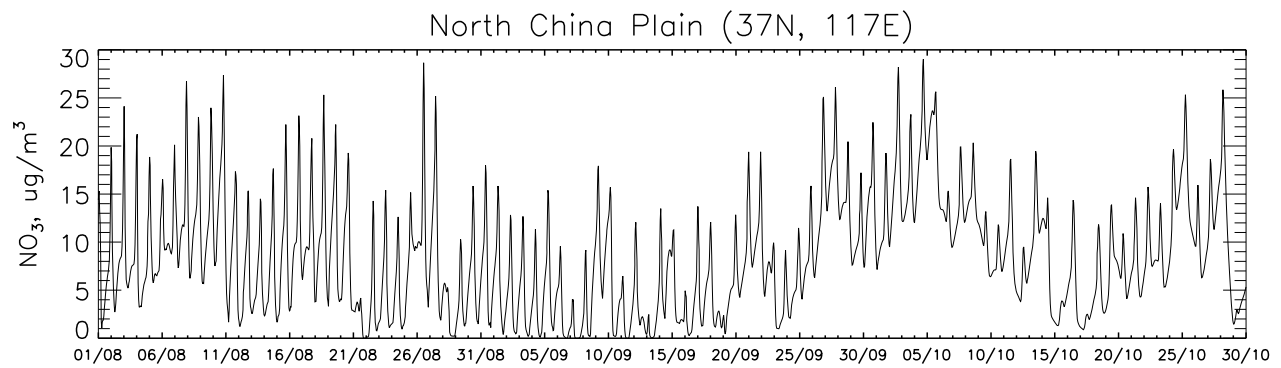

Figure S2

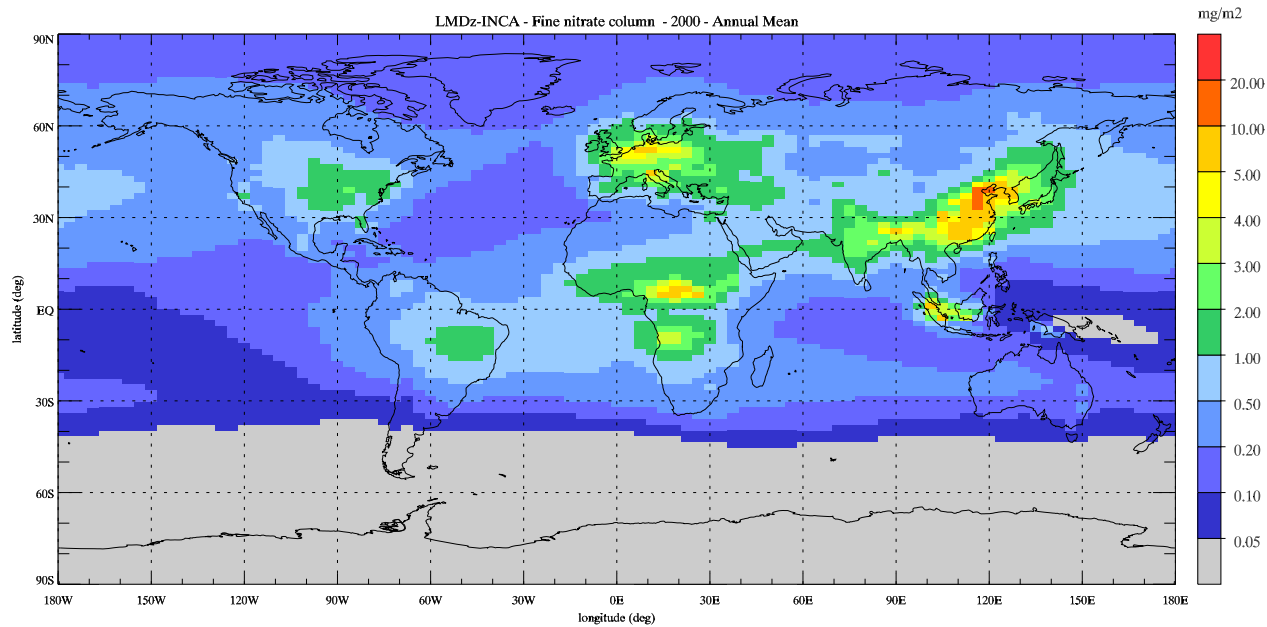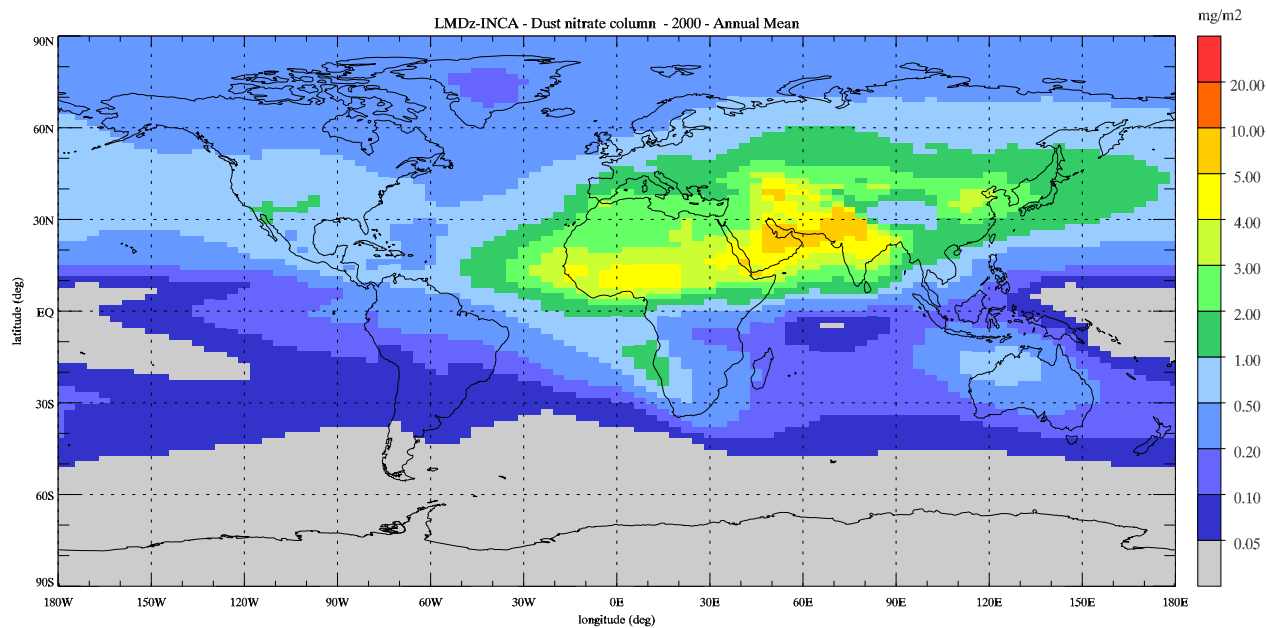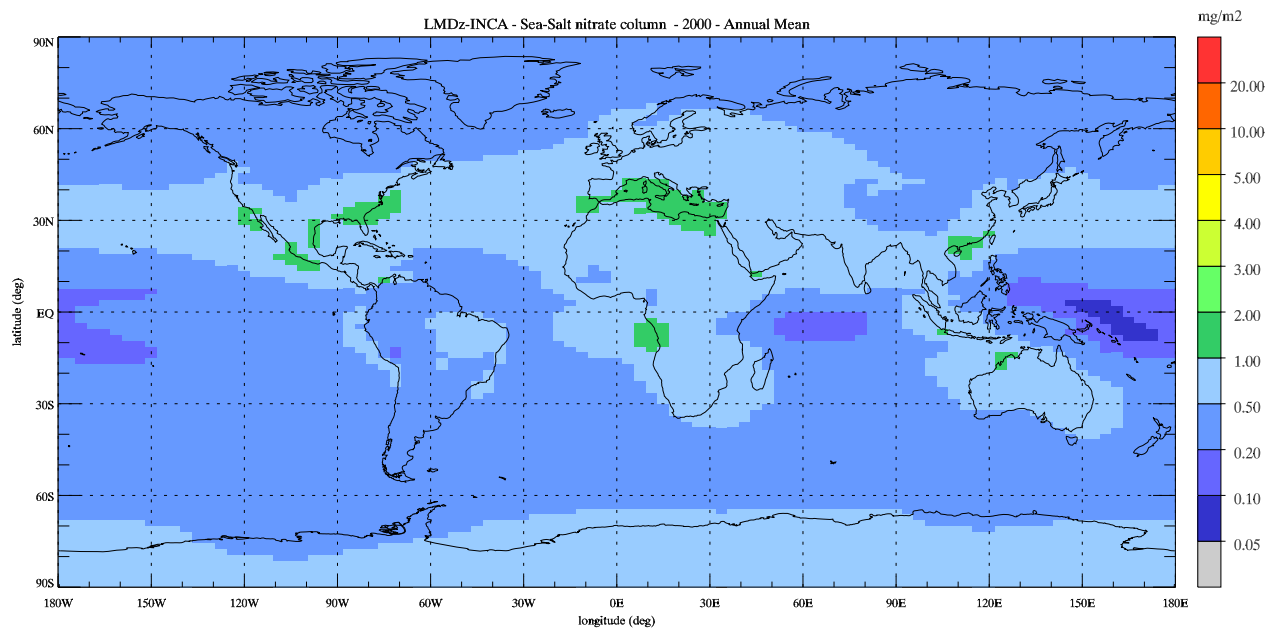

Figure S3



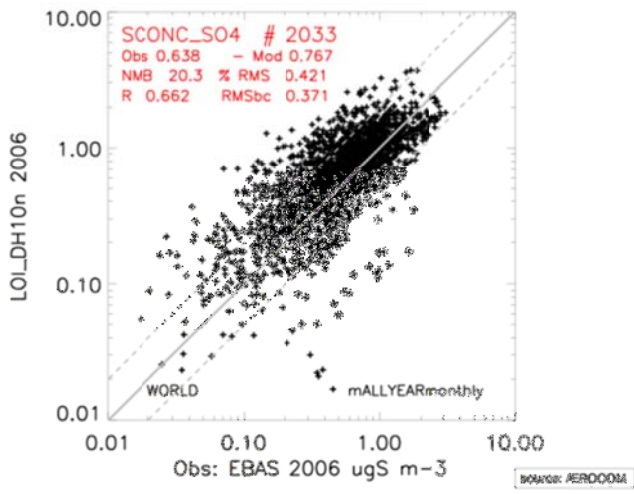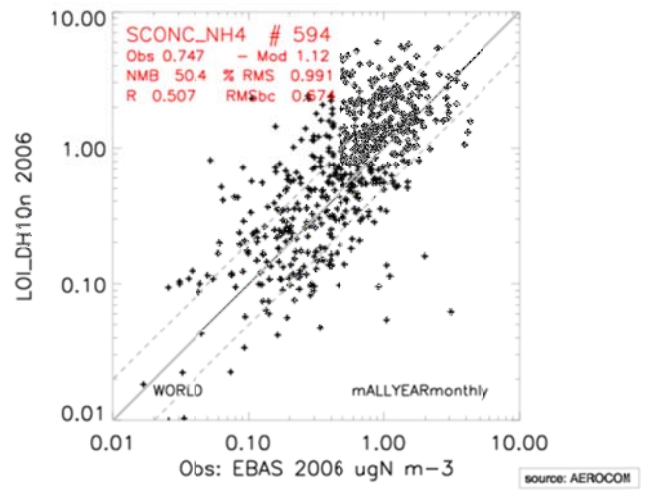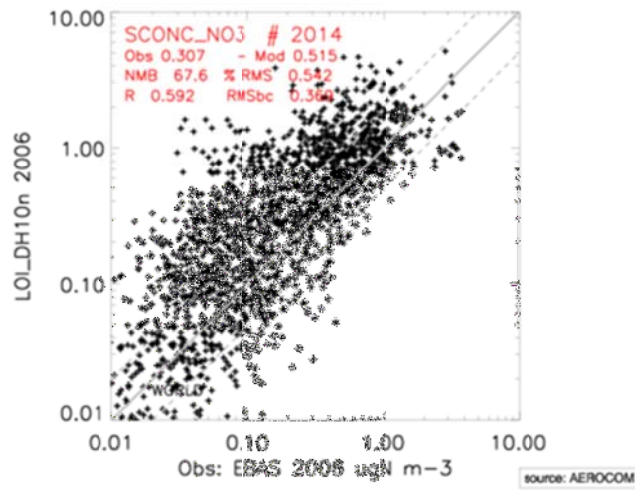

Figure S4

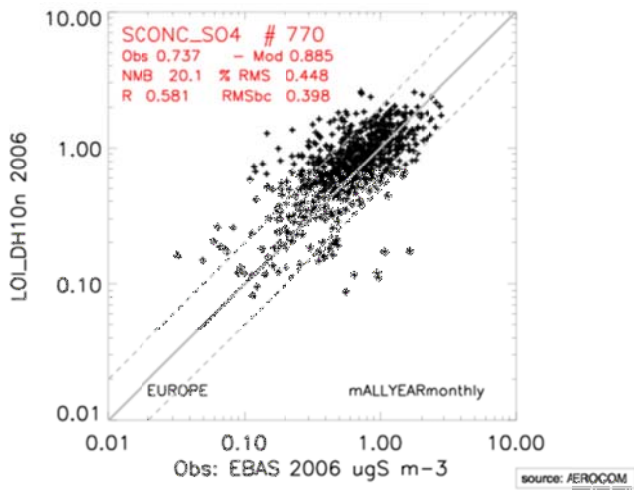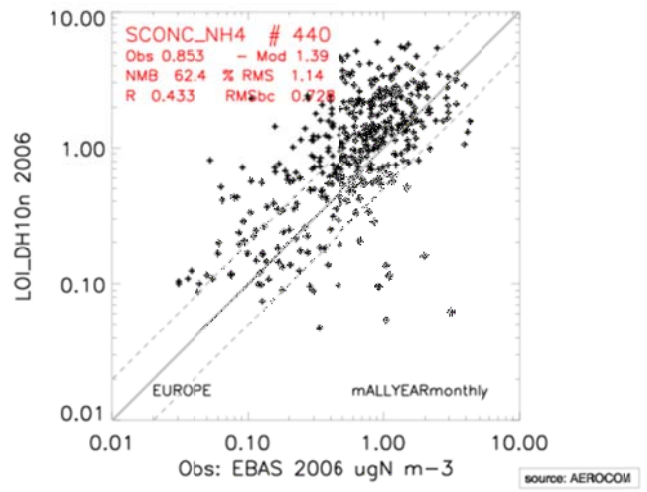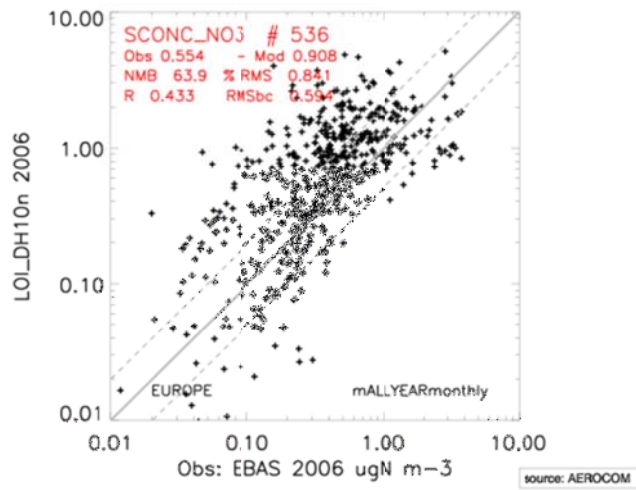

Figure S5

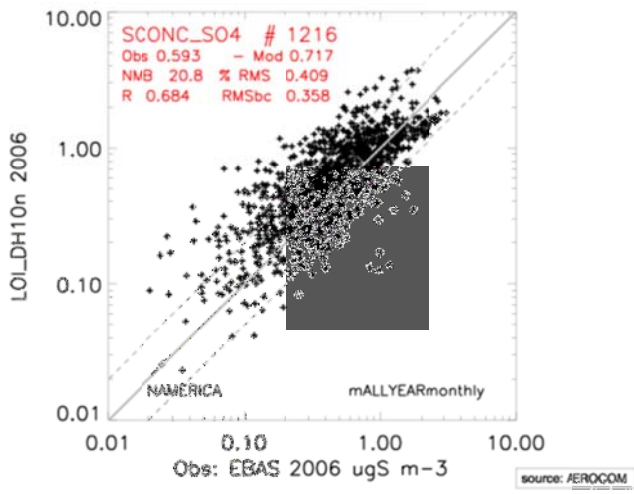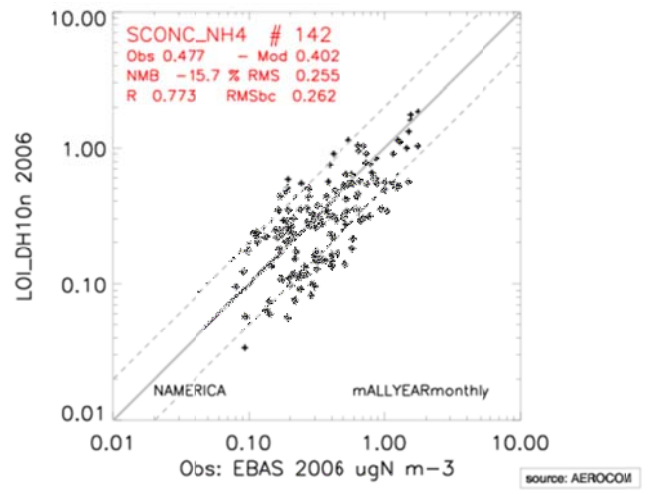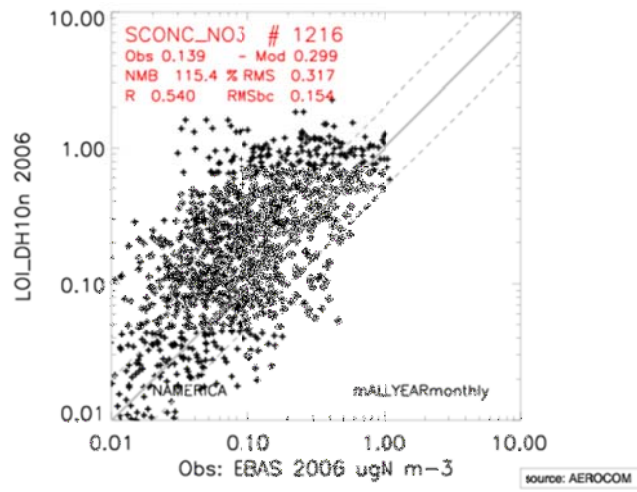

Figure S6

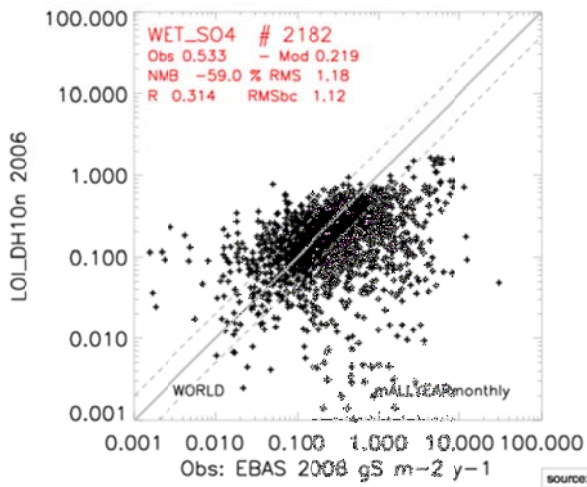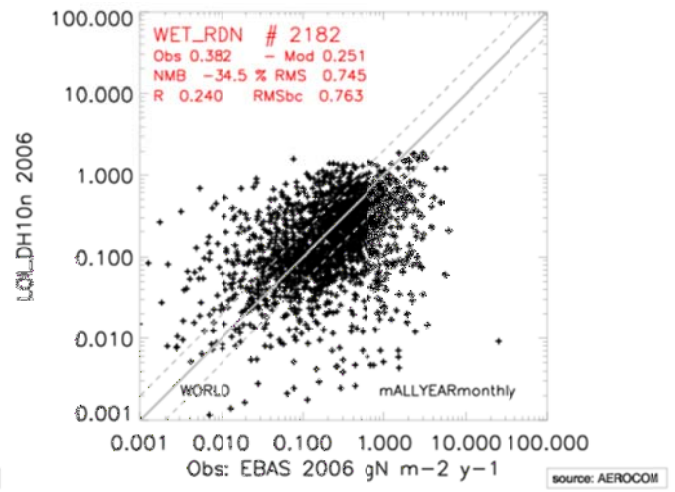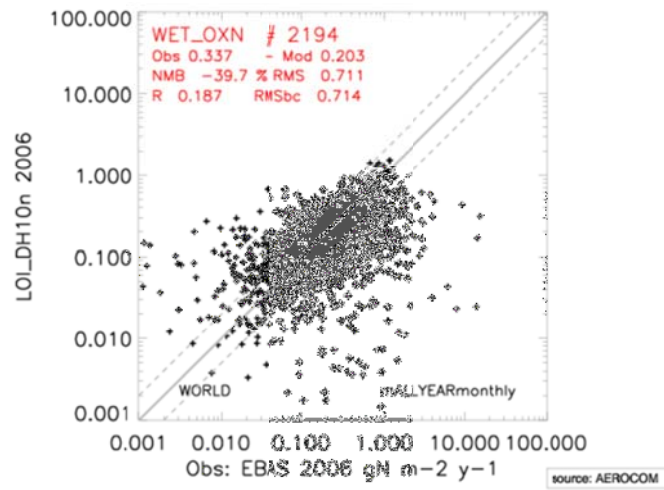

Figure S7

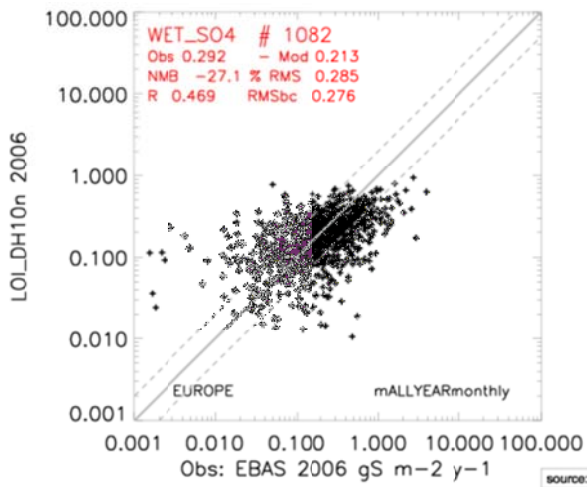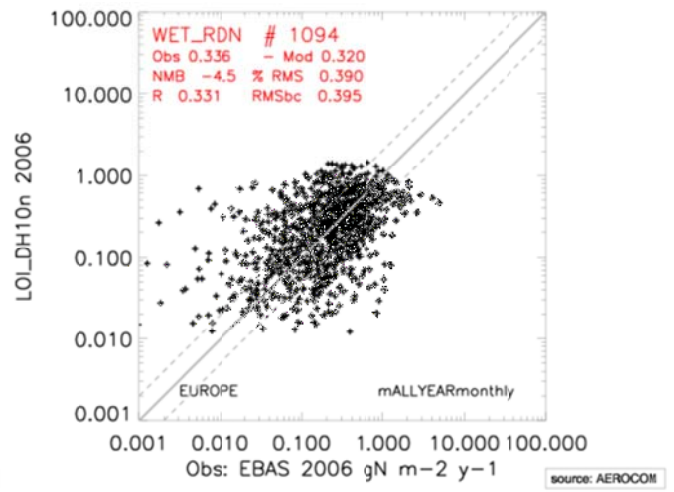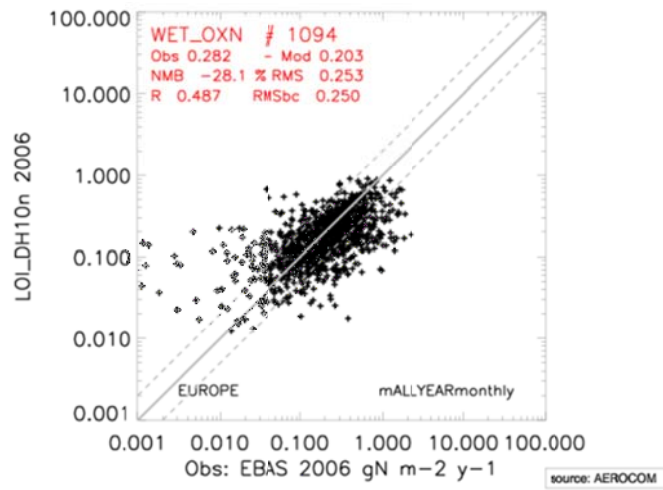

Figure S8

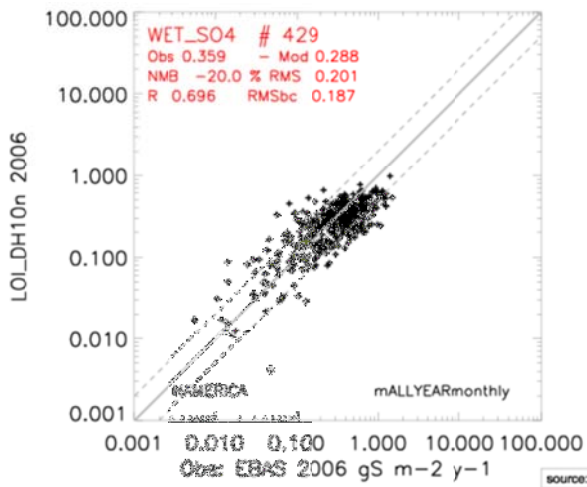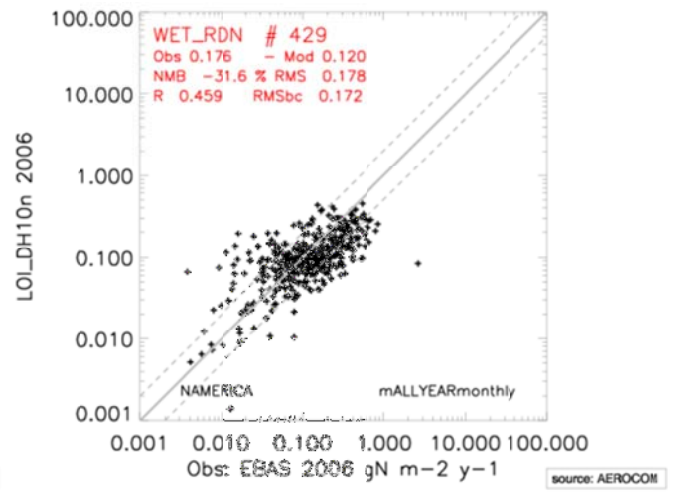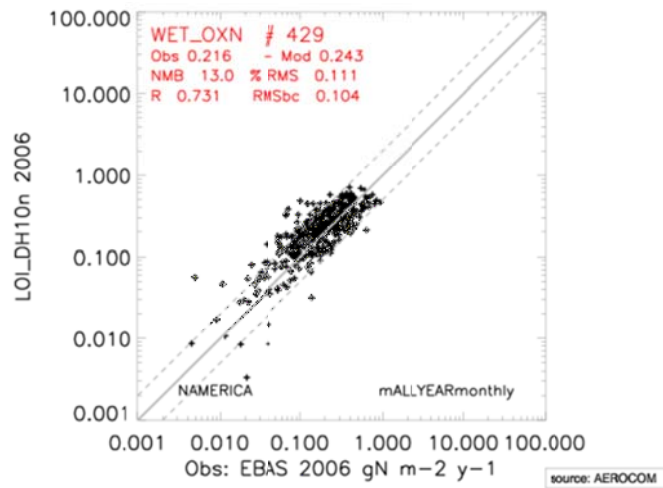

Figure S9

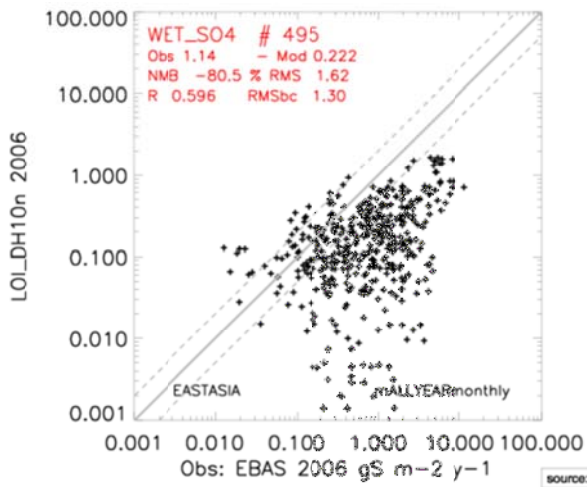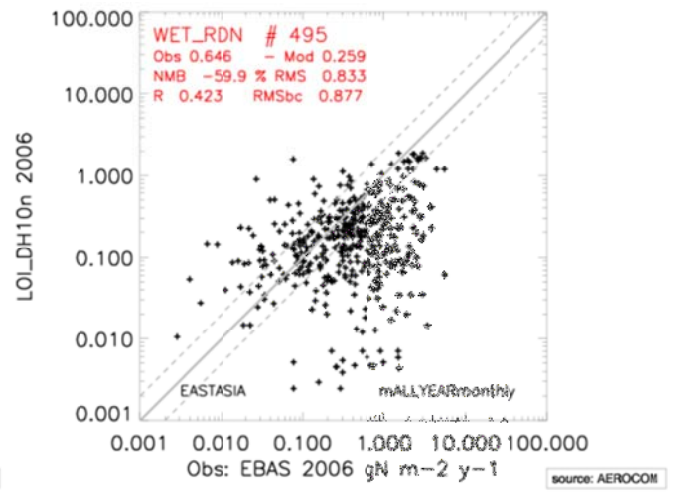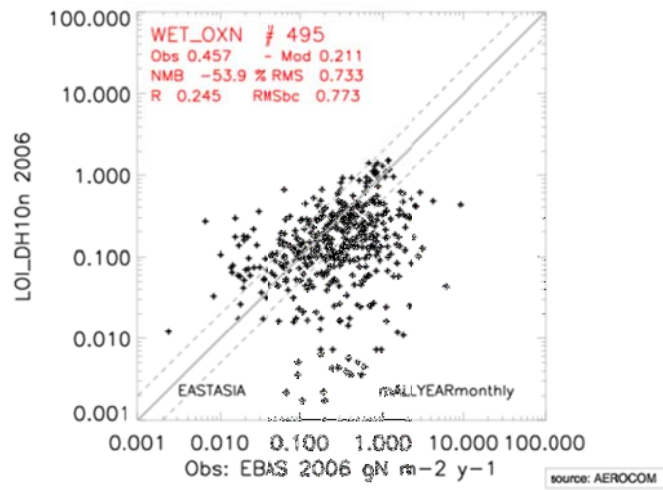

Figure S10

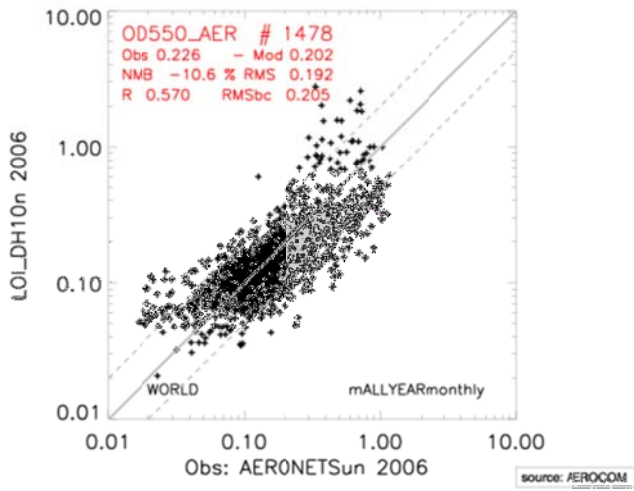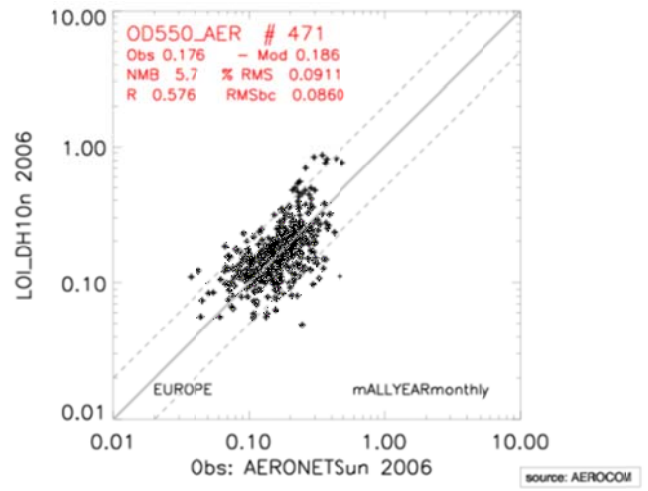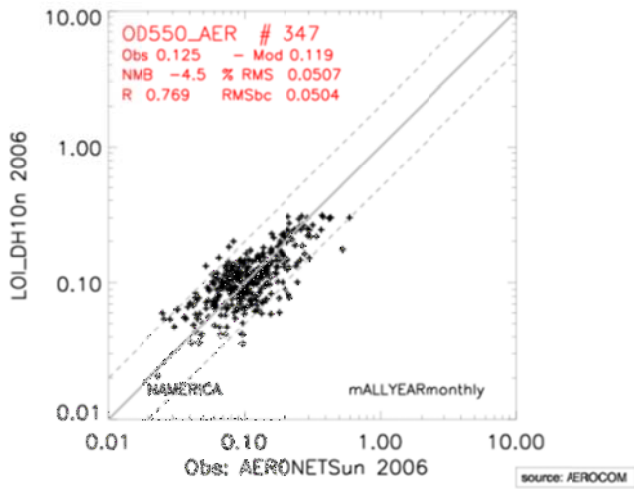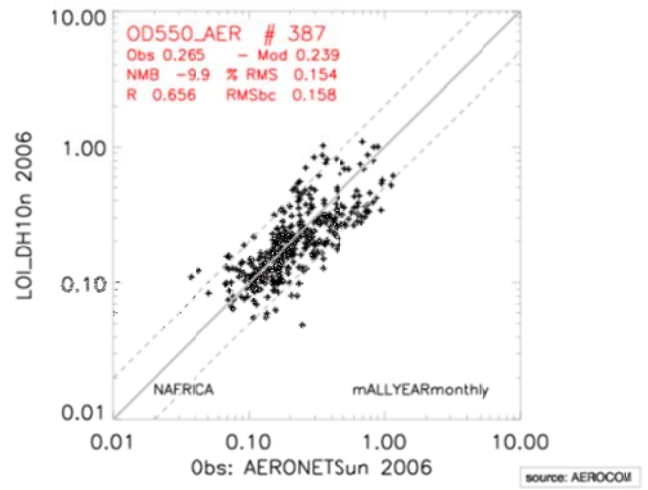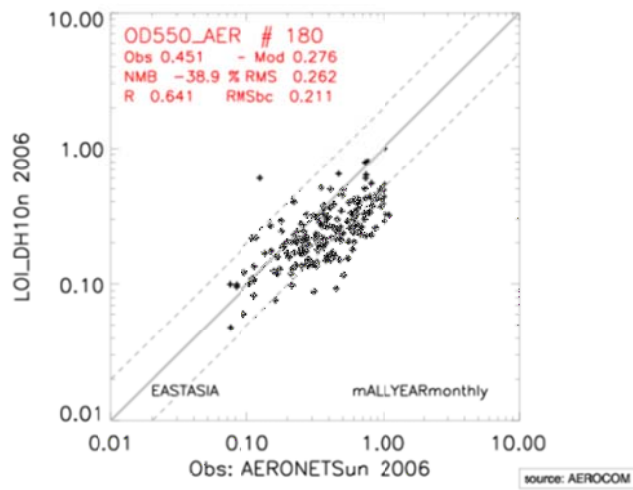

Figure S11



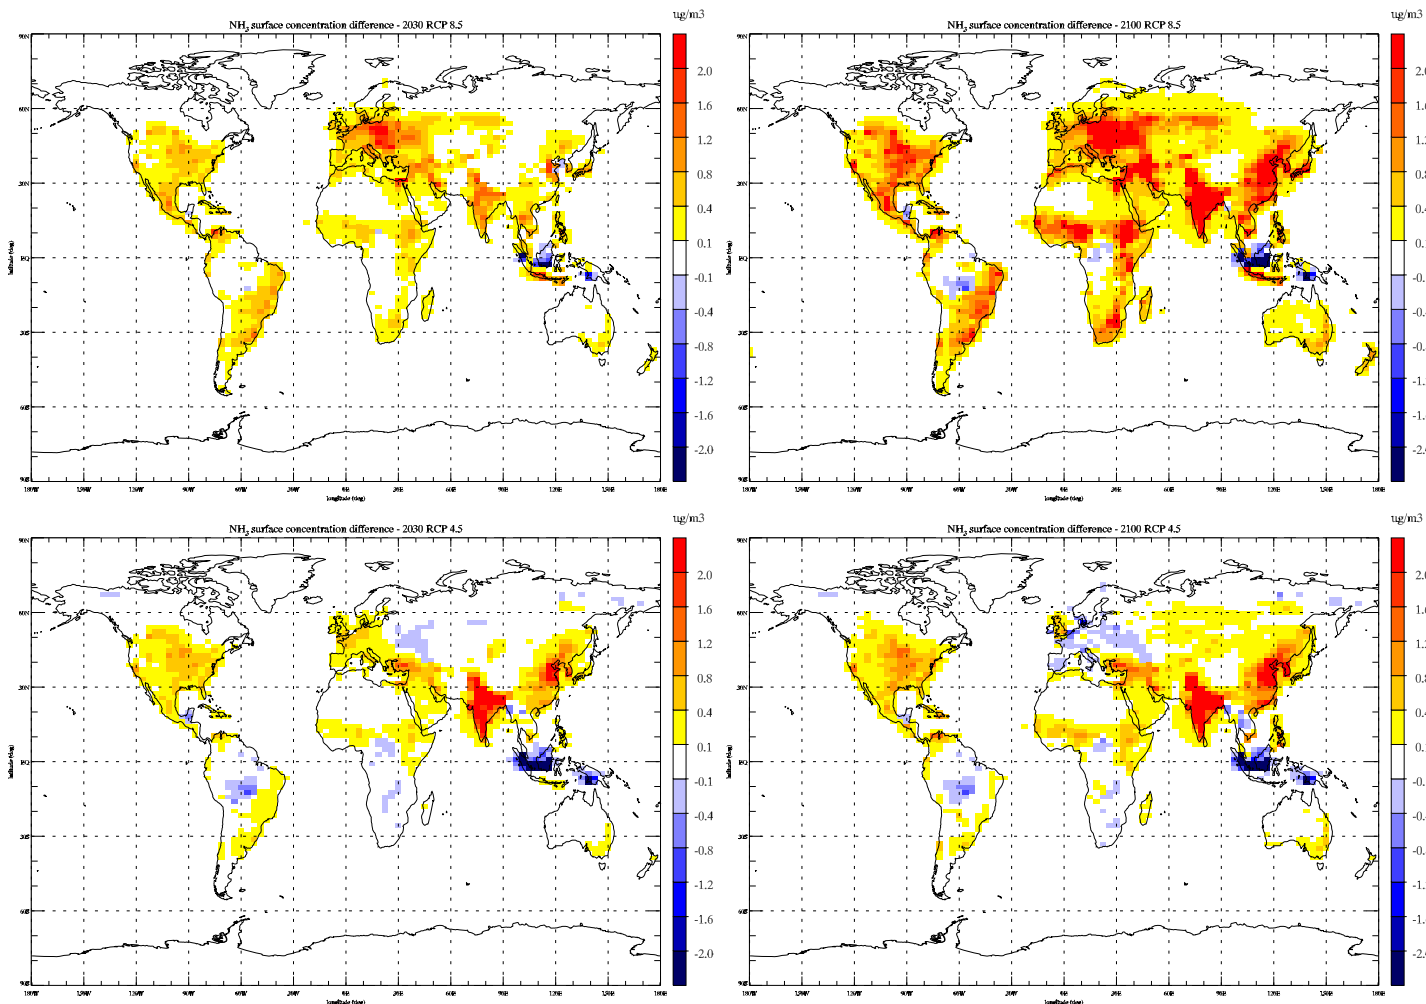

Figure S12

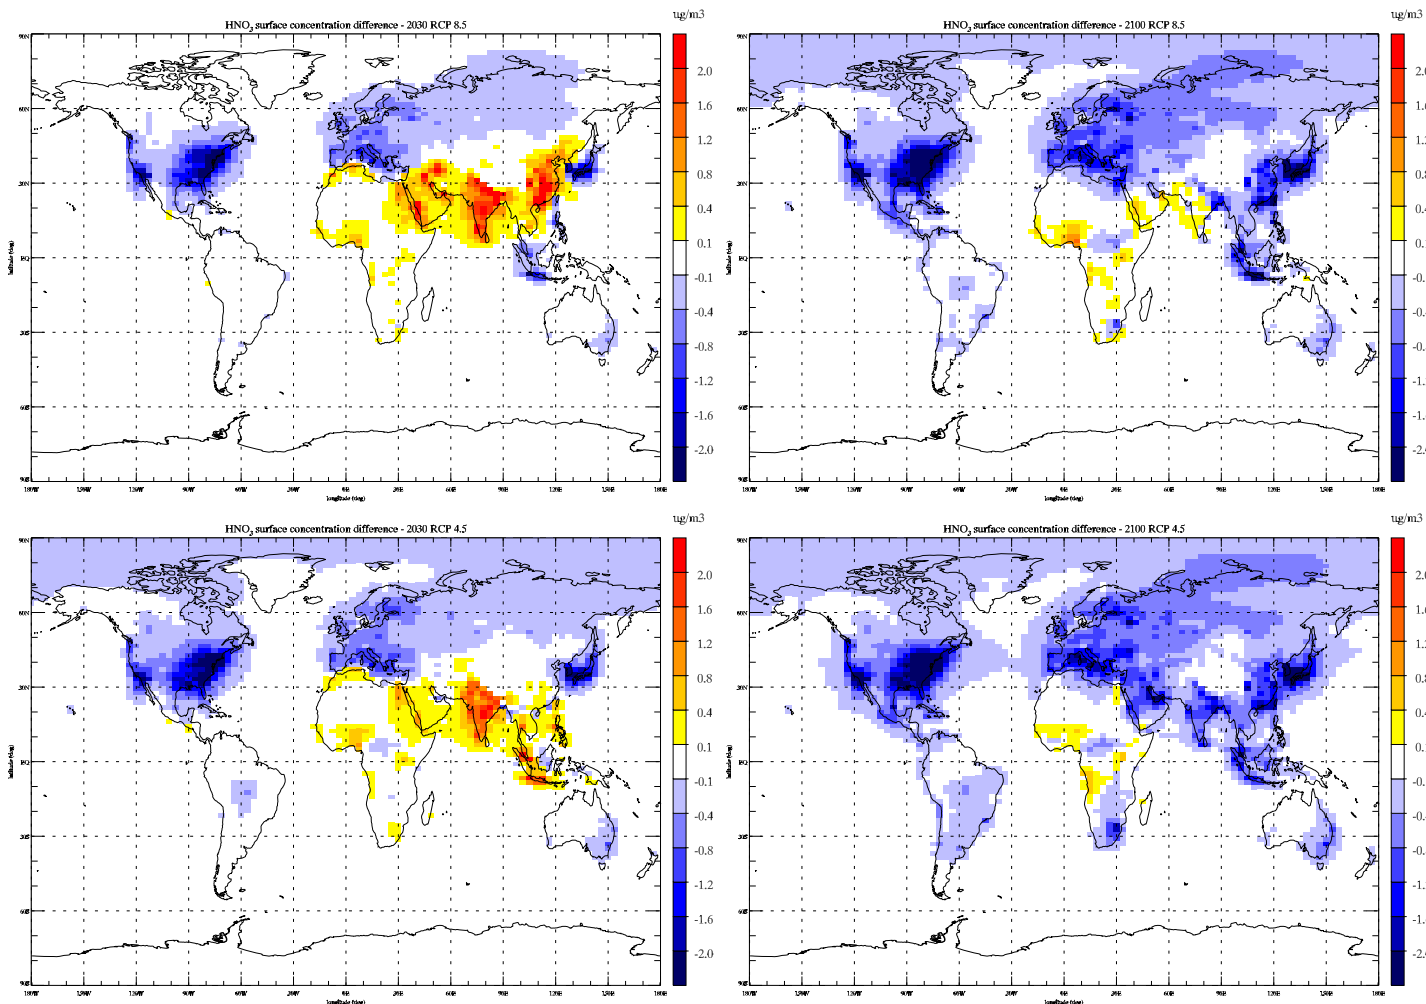

Figure S13

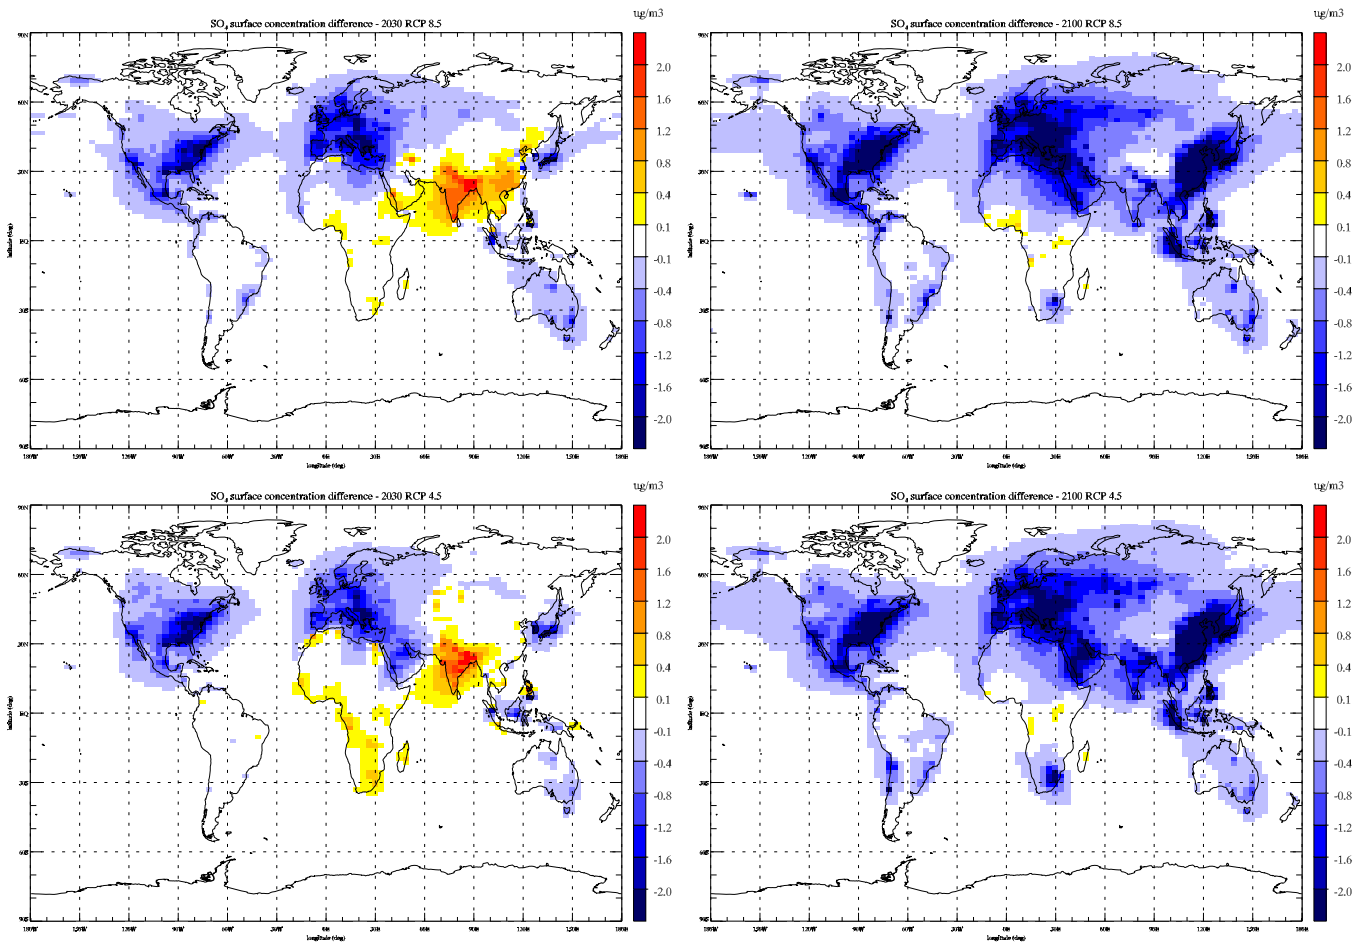

Figure S14

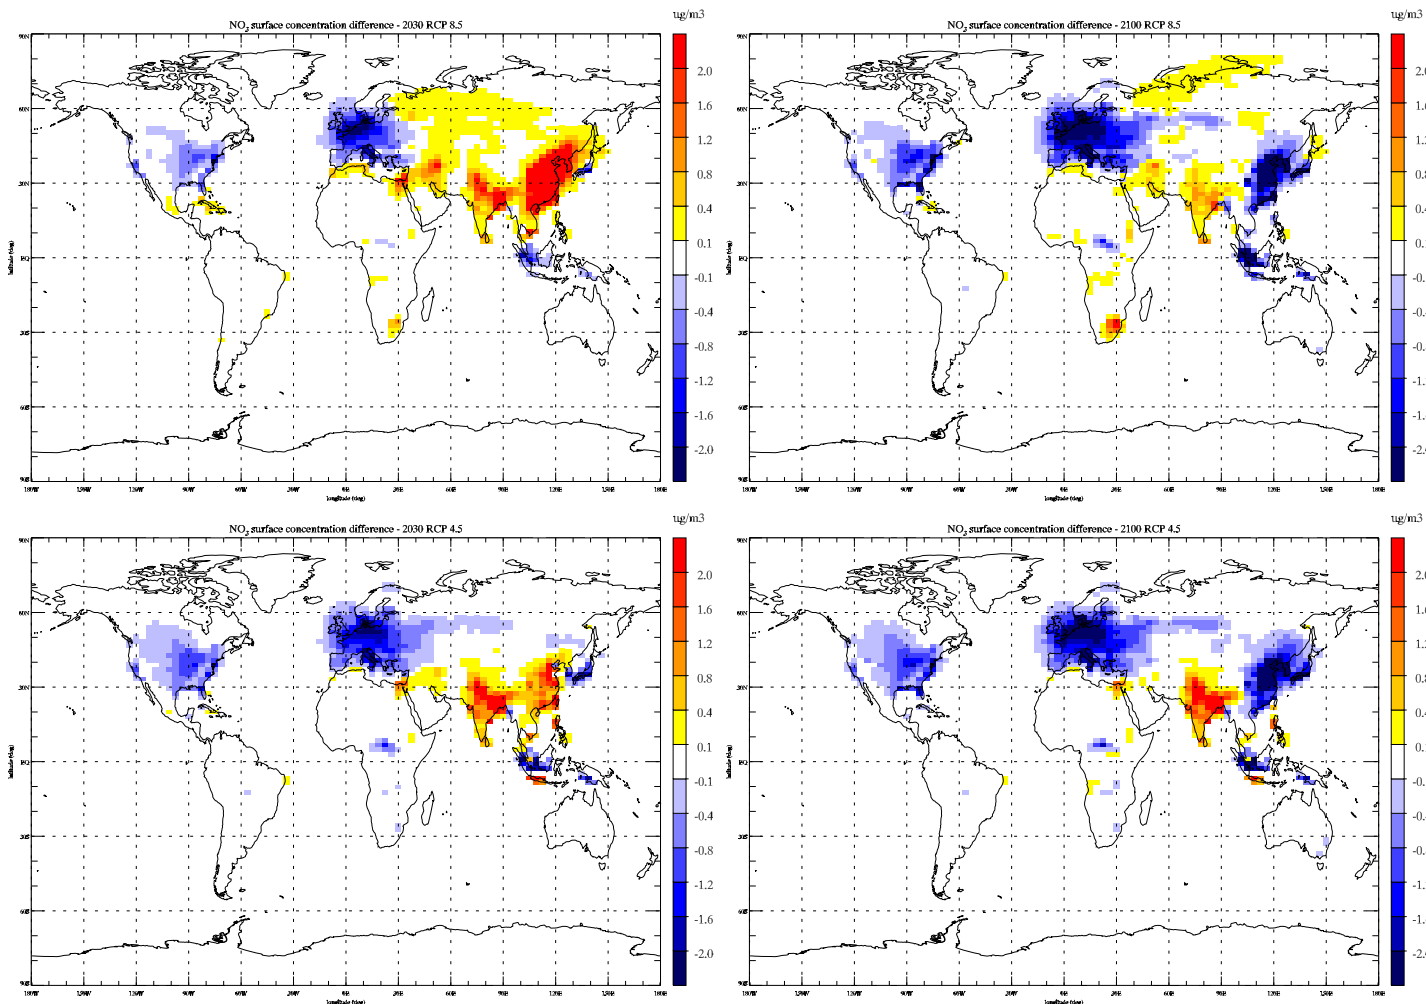

Figure S15

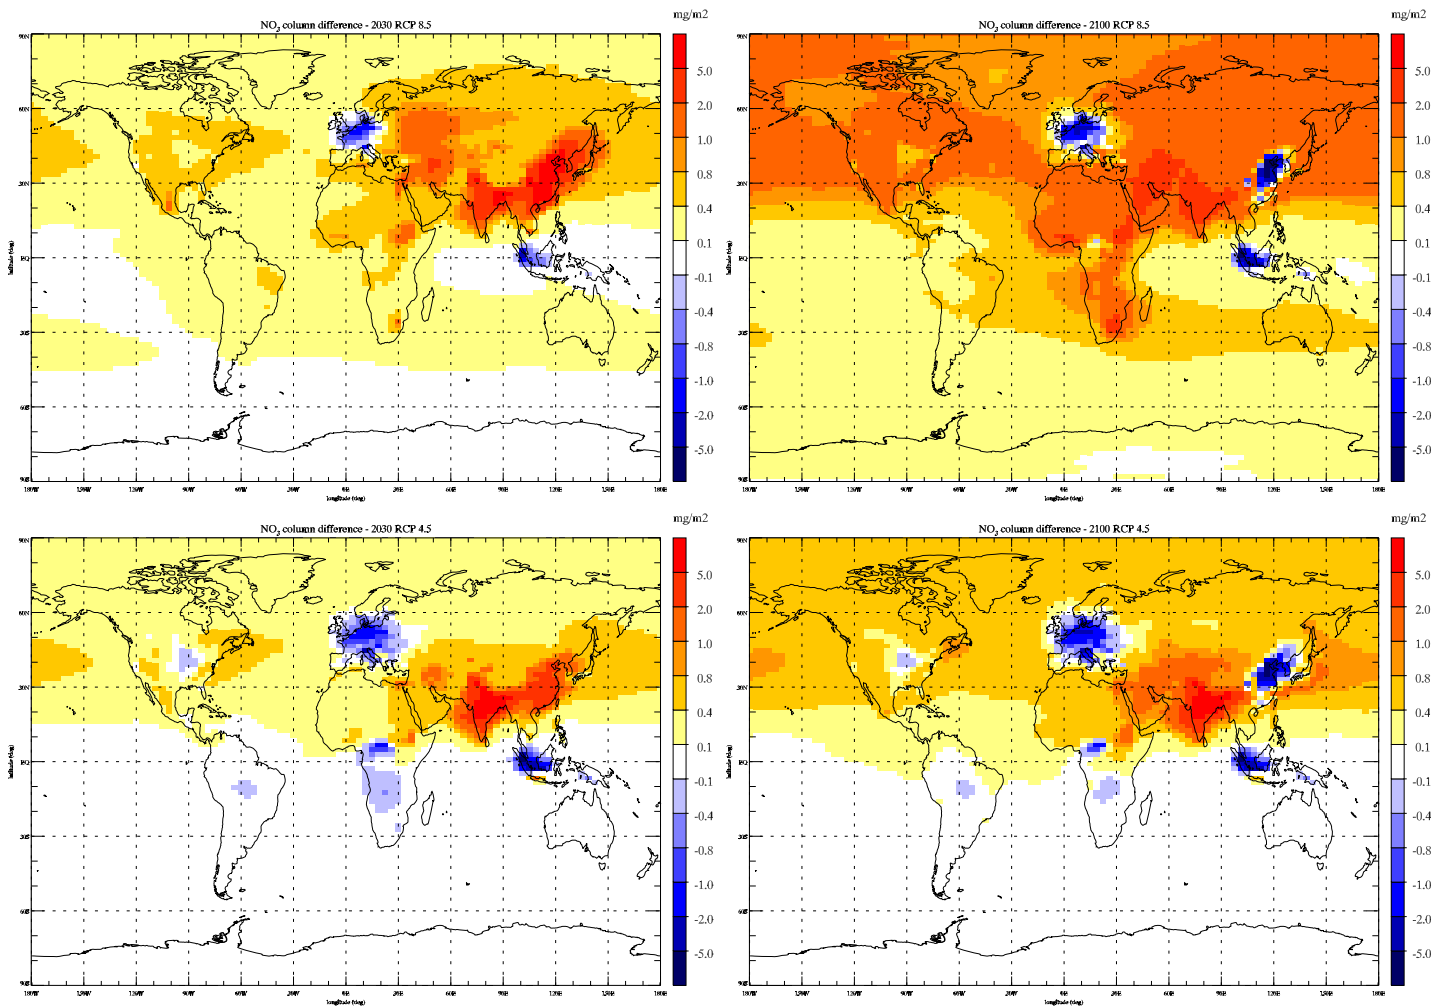

Figure S16

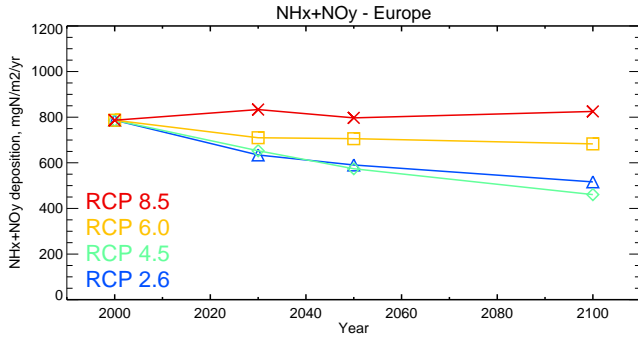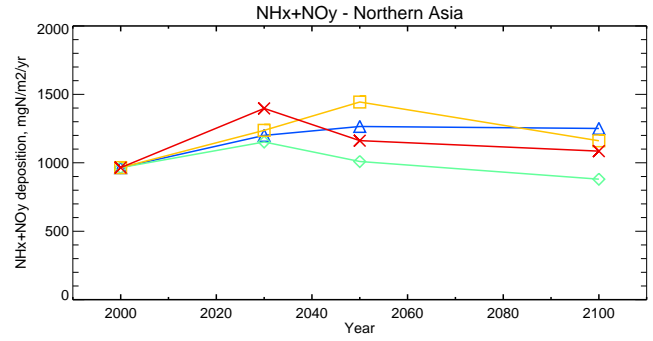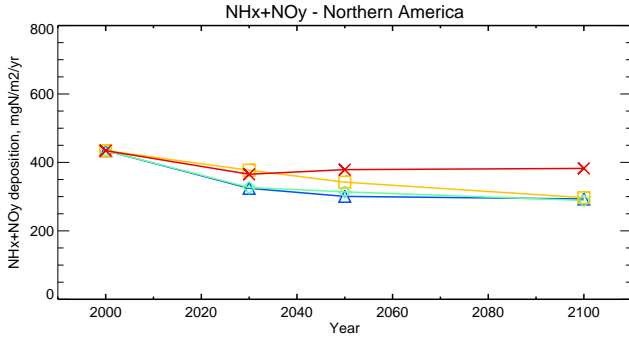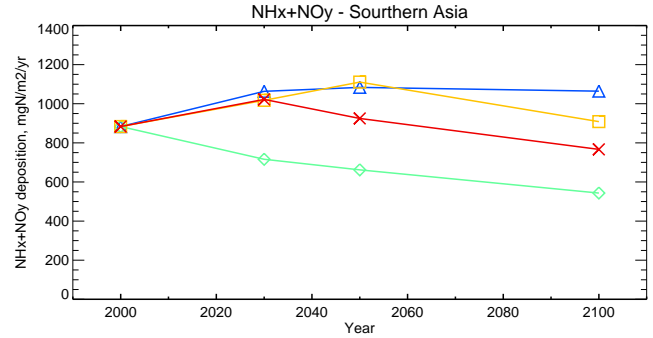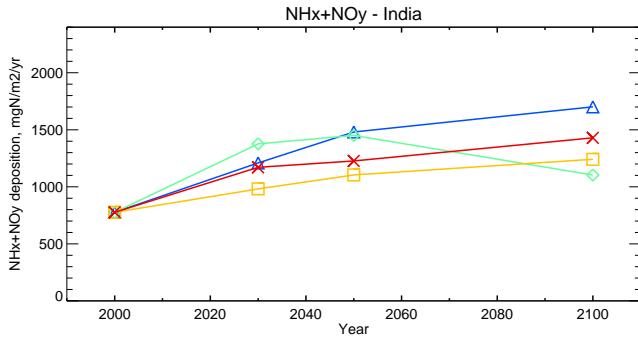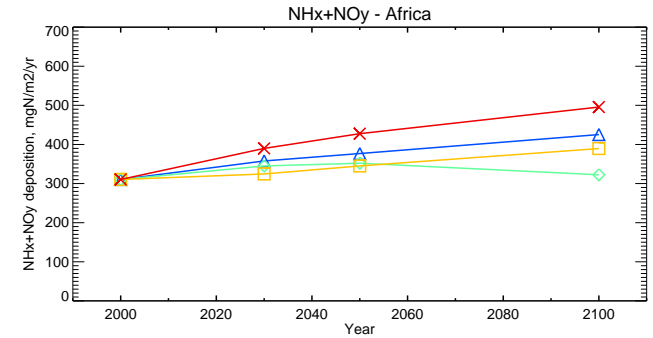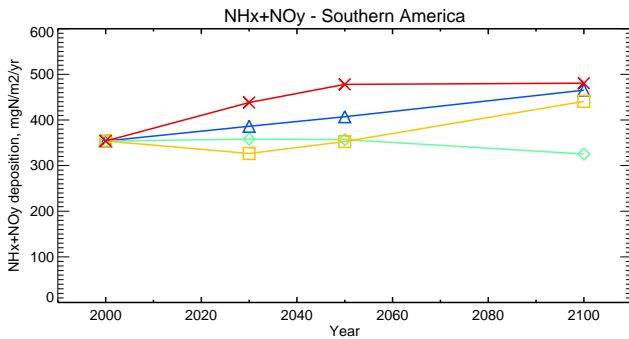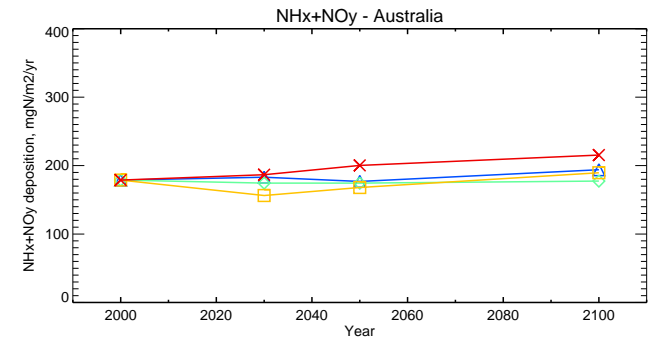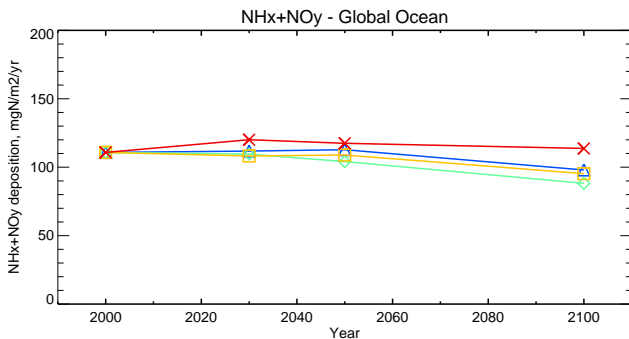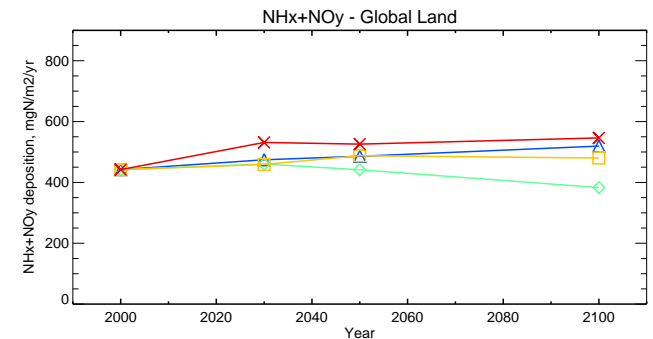

Figure S17

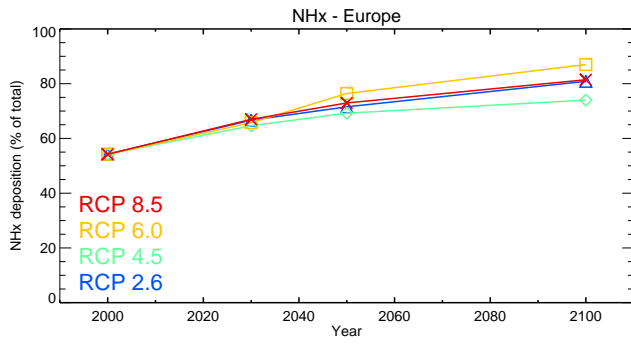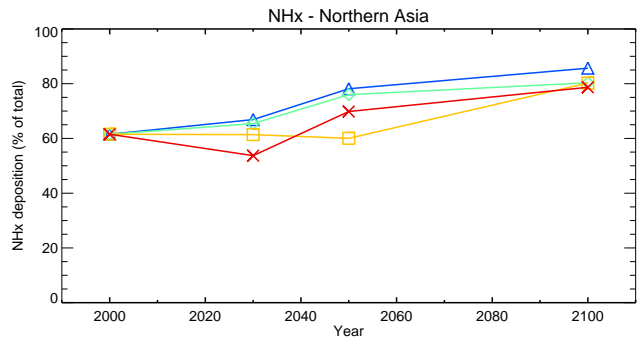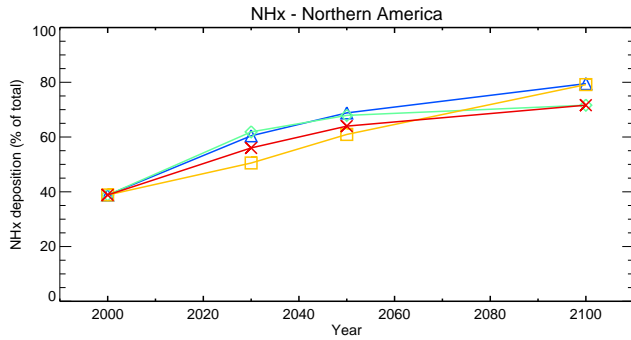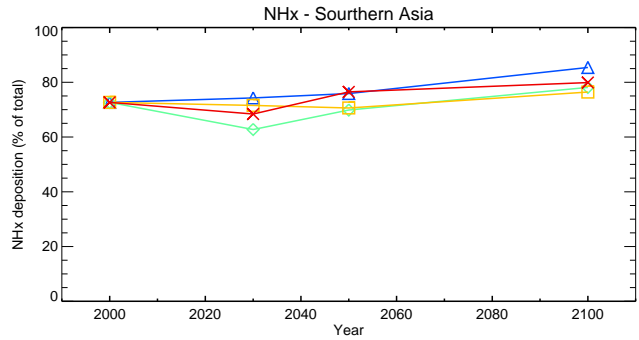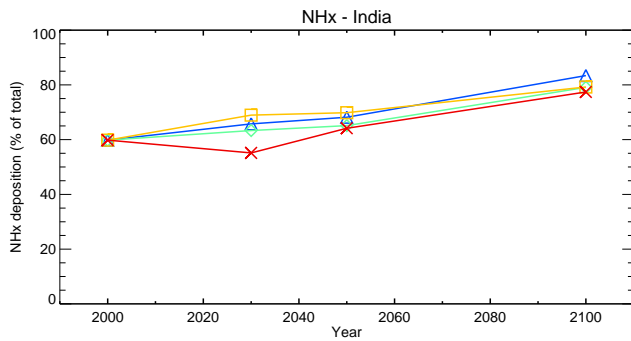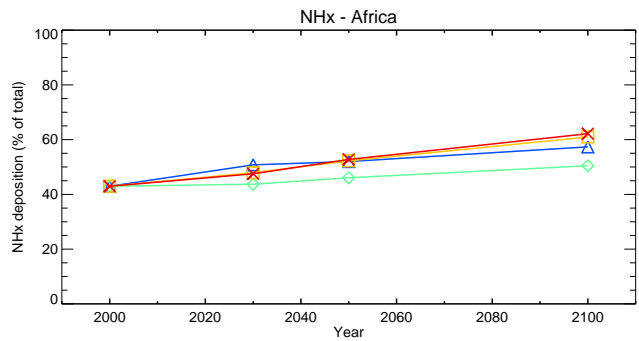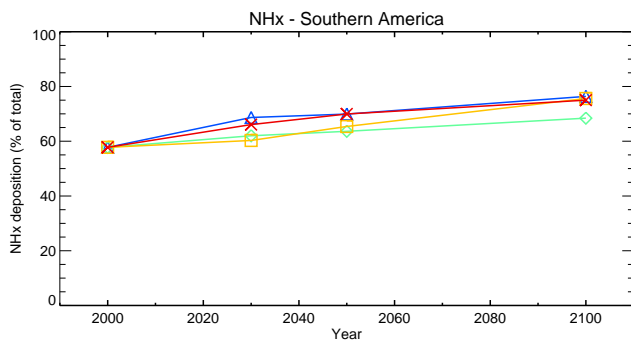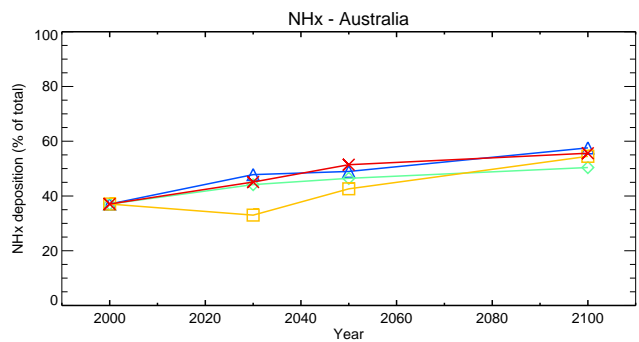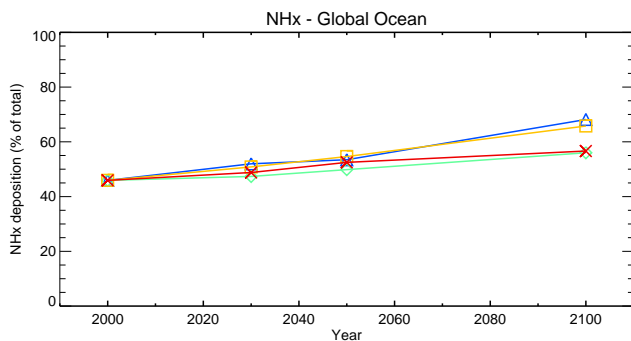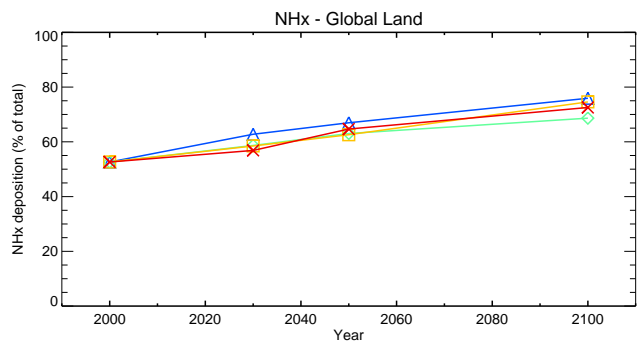

Figure S18
